# Supplementary material for: Integrating microRNA and mRNA expression profiling in Symbiodinium microadriaticum, a dinoflagellate symbiont of reef-building corals
Source: PubMed Central journal article supplement (PMC3853145; doi:10.1186/1471-2164-14-704), 2013-10-12
Supplement: 1471-2164-14-704-S1.pdf [file 1471-2164-14-704-S1.pdf]

Provisional ID : 3826332\_77065\_2337952\_3782493+,...,3787871+\_24618  
 Score total : 7503.4  
 Score for star read(s) : 3.9  
 Score for read counts : 7495.6  
 Score for mfe : 2.9  
 Score for randfold : 1.6  
 Score for cons. seed : -0.6  
 Total read count : 14714  
 Mature read count : 14248  
 Loop read count : 26  
 Star read count : 440

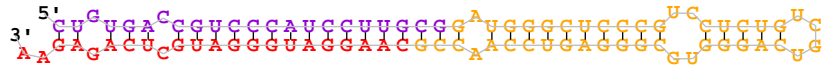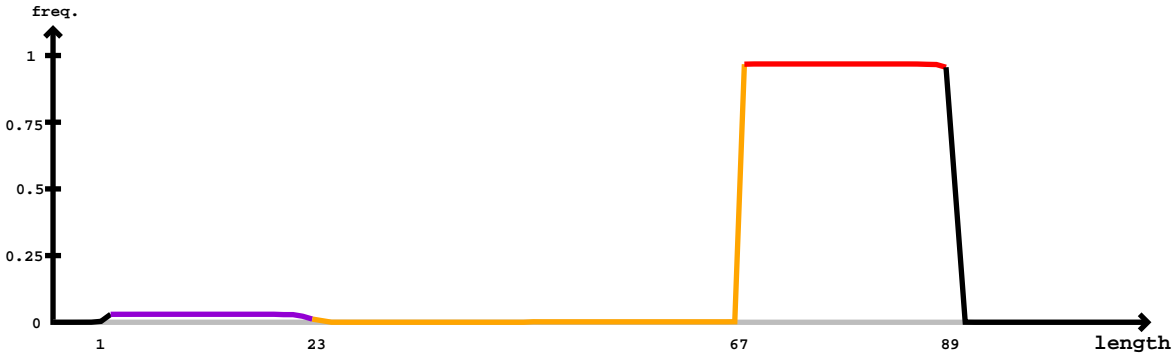

Star

Mature

| 5'   | Star                       | Mature                                      | -3'                    | obs                    | mm    | sample |
|------|----------------------------|---------------------------------------------|------------------------|------------------------|-------|--------|
| 5' - | uuuuCUGUGACCGUCCCAUCCUUGCG | gaugggucuccgucucugucgucagggugcgggaguccaaccg | caaggaugggaugcucagagaa | aaagcugagaggagcccaagga | -3'   | obs    |
|      | uuuuCUGUGACCGUCCCAUCCUUGCG | gaugggucuccgucucugucgucagggugcgggaguccaaccg | caaggaugggaugcucagagaa | aaagcugagaggagcccaagga | exp   |        |
|      | ((((((((.....)))))))))     | (((((.....))))))                            | (((((.....))))))       | (((((.....))))))       | reads |        |
|      | .uGucugugaccgucuccauccuugc | .....                                       | .....                  | .....                  | 1     | 1      |
|      | ..uucugugaccgucuccauccuugU | .....                                       | .....                  | .....                  | 2     | 1      |
|      | ...ucugugaccgucuccauccu    | .....                                       | .....                  | .....                  | 3     | 0      |
|      | ...ucugugaccgucuccauccuug  | .....                                       | .....                  | .....                  | 5     | 0      |
|      | ...ucugugaccgucuccauccuugc | .....                                       | .....                  | .....                  | 40    | 0      |
|      | ...ucugugaccgucuccauccuugU | .....                                       | .....                  | .....                  | 1     | 1      |
|      | ...cugugaccgucuccauccu     | .....                                       | .....                  | .....                  | 15    | 0      |
|      | ...cugugaccgucuccauccu     | .....                                       | .....                  | .....                  | 2     | 0      |
|      | ...cugugaccgucuccauccuug   | .....                                       | .....                  | .....                  | 80    | 0      |
|      | ...cugugacUguccauccuug     | .....                                       | .....                  | .....                  | 1     | 1      |
|      | ...cugugaccgucuccauccuU    | .....                                       | .....                  | .....                  | 1     | 1      |
|      | ...cugugaccAuccauccuugc    | .....                                       | .....                  | .....                  | 1     | 1      |
|      | ...cugugaccgucuccauccuugc  | .....                                       | .....                  | .....                  | 90    | 0      |
|      | ...cugugaccgucuccauccuugA  | .....                                       | .....                  | .....                  | 1     | 1      |
|      | ...cugugaccgucuccauAcuugc  | .....                                       | .....                  | .....                  | 1     | 1      |
|      | ...cugugaccgucuccauccuugU  | .....                                       | .....                  | .....                  | 21    | 1      |
|      | ...cugugaccgucuccauccuAcg  | .....                                       | .....                  | .....                  | 1     | 1      |
|      | ...cugugaccgucuccauccuugcU | .....                                       | .....                  | .....                  | 2     | 1      |
|      | ...cugugaccgucuccauccuugcg | .....                                       | .....                  | .....                  | 170   | 0      |
|      | ...ugugaccgucuccauccuug    | .....                                       | .....                  | .....                  | 1     | 0      |
|      | ...ugugaccgucuccauccuugcg  | .....                                       | .....                  | .....                  | 1     | 0      |
|      | ...ugaccgucuccauccuugcggau | .....                                       | .....                  | .....                  | 1     | 0      |
|      | ...ggaugggucuccgucucugucgu | .....                                       | .....                  | .....                  | 2     | 0      |
|      | ...ucagggugcgggaguccaacc   | .....                                       | .....                  | .....                  | 2     | 0      |
|      | ...ucagggugcgggaguccaaccU  | .....                                       | .....                  | .....                  | 1     | 1      |
|      | ...ucagggugcgggaguccaaccg  | .....                                       | .....                  | .....                  | 18    | 0      |
|      | ...ucagggugcgggaguccaaccgU | .....                                       | .....                  | .....                  | 3     | 1      |
|      | ...gcaaggaugggaugcucagaga  | .....                                       | .....                  | .....                  | 1     | 0      |
|      | ...Ccaaggaugggaugcucagaga  | .....                                       | .....                  | .....                  | 1     | 1      |
|      | ...Ccaaggaugggaugcucagagaa | .....                                       | .....                  | .....                  | 4     | 1      |
|      | ...caaggaugggaugcucag      | .....                                       | .....                  | .....                  | 2     | 0      |
|      | ...caaggaugggaugcucagU     | .....                                       | .....                  | .....                  | 2     | 1      |
|      | ...caaggaugggaugcucaga     | .....                                       | .....                  | .....                  | 15    | 0      |

Star

Mature

| Sequence                                                                                                     | Count | Count | Label |
|--------------------------------------------------------------------------------------------------------------|-------|-------|-------|
| uuuuucugugaccgucuccauccuugcggaugggucuccugucugucagggugcgggaguccaaccgcaaggauggggaugcucagagaaagcugagaggcccaagga |       |       |       |
| .....caaggauggggaugcucagaaA.....                                                                             | 2     | 1     | smb   |
| .....caaggauggggaugcucagaaU.....                                                                             | 4     | 1     | smb   |
| .....caaggauggggaugcucagag.....                                                                              | 5     | 0     | smb   |
| .....caaggauggggaugcucagaaA.....                                                                             | 1     | 1     | smb   |
| .....caaggauggggaugcucagagaa.....                                                                            | 142   | 0     | smb   |
| .....caaggauggggaugcucagagaaU.....                                                                           | 5     | 1     | smb   |
| .....caaggauggggaugcucagagaaG.....                                                                           | 5     | 1     | smb   |
| .....cGaggauggggaugcucagagaa.....                                                                            | 2     | 1     | smb   |
| .....caaggauggggaugcuUagagaa.....                                                                            | 2     | 1     | smb   |
| .....caaggauggggaugUucagagaa.....                                                                            | 3     | 1     | smb   |
| .....caaggauggggaGgcucagagaa.....                                                                            | 3     | 1     | smb   |
| .....caaggaUagggaugcucagagaa.....                                                                            | 1     | 1     | smb   |
| .....cCaggauggggaugcucagagaa.....                                                                            | 2     | 1     | smb   |
| .....caaggaugAgaugcucagagaa.....                                                                             | 1     | 1     | smb   |
| .....caaggauggggaugcucGagagaa.....                                                                           | 4     | 1     | smb   |
| .....caaggauggggaugcucagaaC.....                                                                             | 2     | 1     | smb   |
| .....caaggaugggUugcucagagaa.....                                                                             | 7     | 1     | smb   |
| .....caaggauggCaugcucagagaa.....                                                                             | 2     | 1     | smb   |
| .....caaggaugggaaAucucagagaa.....                                                                            | 3     | 1     | smb   |
| .....caaggUuggggaugcucagagaa.....                                                                            | 1     | 1     | smb   |
| .....caaggauggggaugcCagagaa.....                                                                             | 4     | 1     | smb   |
| .....caaCgauggggaugcucagagaa.....                                                                            | 1     | 1     | smb   |
| .....caaggauggggaugcucagCgaa.....                                                                            | 1     | 1     | smb   |
| .....caaggauggggaugcucagagaaU.....                                                                           | 37    | 1     | smb   |
| .....caaggauggggaUucucagagaa.....                                                                            | 1     | 1     | smb   |
| .....cUaggauggggaugcucagagaa.....                                                                            | 1     | 1     | smb   |
| .....caaggauggggaCgcucagagaa.....                                                                            | 3     | 1     | smb   |
| .....caaggauggggaugcuGagagaa.....                                                                            | 1     | 1     | smb   |
| .....caaggaugUgagcucagagaa.....                                                                              | 2     | 1     | smb   |
| .....caaggaCgggaugcucagagaa.....                                                                             | 2     | 1     | smb   |
| .....caaggauggggaugcucagagaa.....                                                                            | 13138 | 0     | smb   |
| .....caGggauggggaugcucagagaa.....                                                                            | 2     | 1     | smb   |
| .....caaggauggggaugcucaaAagaa.....                                                                           | 2     | 1     | smb   |
| .....caaggauggggaugcAagagaa.....                                                                             | 2     | 1     | smb   |
| .....caaggaugggGugcucagagaa.....                                                                             | 2     | 1     | smb   |
| .....caaAgauggggaugcucagagaa.....                                                                            | 1     | 1     | smb   |
| .....caaggauggAaugcucagagaa.....                                                                             | 1     | 1     | smb   |
| .....caaggauggggaugcucagagaaG.....                                                                           | 1     | 1     | smb   |
| .....caaggaAagggaugcucagagaa.....                                                                            | 1     | 1     | smb   |
| .....caaggGugggaugcucagagaa.....                                                                             | 1     | 1     | smb   |
| .....caaggauUgggaugcucagagaa.....                                                                            | 6     | 1     | smb   |
| .....Uaaggauggggaugcucagagaa.....                                                                            | 3     | 1     | smb   |
| .....caaggauggggaAgcucagagaa.....                                                                            | 3     | 1     | smb   |
| .....caaUgauggggaugcucagagaa.....                                                                            | 3     | 1     | smb   |
| .....caaggaugCgaugcucagagaa.....                                                                             | 1     | 1     | smb   |
| .....caaggauggggaugcucagGgaa.....                                                                            | 5     | 1     | smb   |
| .....caagAauggggaugcucagagaa.....                                                                            | 2     | 1     | smb   |
| .....caagUauggggaugcucagagaa.....                                                                            | 1     | 1     | smb   |
| .....caagCauggggaugcucagagaa.....                                                                            | 1     | 1     | smb   |
| .....caaggauggUaugcucagagaa.....                                                                             | 3     | 1     | smb   |
| .....Gaaggauggggaugcucagagaa.....                                                                            | 1     | 1     | smb   |
| .....caaggauggggaugcucagagaaC.....                                                                           | 2     | 1     | smb   |
| .....caaggauggggaugcucagagaaU.....                                                                           | 770   | 1     | smb   |
| .....caaggauggggaugcucagagaaA.....                                                                           | 3     | 0     | smb   |
| .....caaggauggggaugcucagagaaUa.....                                                                          | 2     | 1     | smb   |
| .....caaggauggggaugcucagagaaAG.....                                                                          | 1     | 1     | smb   |
| .....caaggauggggaugcucagagaaAU.....                                                                          | 1     | 1     | smb   |
| .....aaggauggggaugcucagagaa.....                                                                             | 12    | 0     | smb   |
| .....aaggauggggaugcucagagaaU.....                                                                            | 2     | 1     | smb   |

Provisional ID : 3811157\_23229\_411523\_11197\_669303\_283453\_5183\_40295578\_11112323\_10040  
 Score total : 2080.1  
 Score for star read(s) : 3.9  
 Score for read counts : 2074.1  
 Score for mfe : 2.7  
 Score for randfold : 0  
 Score for cons. seed : -0.6  
 Total read count : 4080  
 Mature read count : 3602  
 Loop read count : 38  
 Star read count : 440

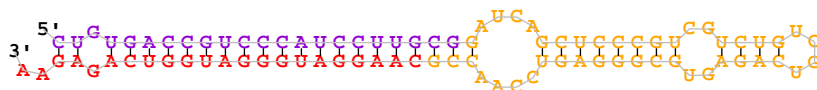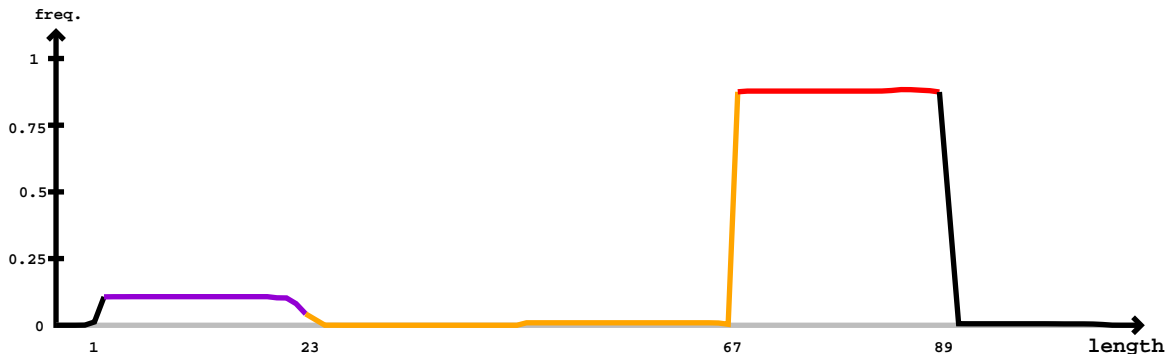

**Star**

**Mature**

| 5' -                                                                                                            | 3' | obs | exp | reads | mm  | sample |
|-----------------------------------------------------------------------------------------------------------------|----|-----|-----|-------|-----|--------|
| auucugugaccgucccauccuugcggaucagcucccgucgucugucgucagagugcgggaguccaaccgcaaggauugggauggucagagaaaagcugaggccaaggagga |    |     |     |       |     |        |
| uuucugugaccgucccauccuugU                                                                                        |    | 2   | 1   |       | smb |        |
| ucugugaccgucccauccu.                                                                                            |    | 3   | 0   |       | smb |        |
| ucugugaccgucccauccuU.                                                                                           |    | 5   | 0   |       | smb |        |
| ucugugaccgucccauccuU.                                                                                           |    | 1   | 1   |       | smb |        |
| ucugugaccgucccauccuugc.                                                                                         |    | 40  | 0   |       | smb |        |
| cugugaccgucccauccu.                                                                                             |    | 15  | 0   |       | smb |        |
| cugugaccgucccauccuu.                                                                                            |    | 2   | 0   |       | smb |        |
| cugugacUgucccauccuug.                                                                                           |    | 1   | 1   |       | smb |        |
| cugugaccgucccauccuug.                                                                                           |    | 80  | 0   |       | smb |        |
| cugugaccgucccauccuuU.                                                                                           |    | 1   | 1   |       | smb |        |
| cugugaccgucccauAuccuugc.                                                                                        |    | 1   | 1   |       | smb |        |
| cugugaccgucccauccuugA.                                                                                          |    | 1   | 1   |       | smb |        |
| cugugaccAuoccauccuugc.                                                                                          |    | 1   | 1   |       | smb |        |
| cugugaccgucccauccuugc.                                                                                          |    | 90  | 0   |       | smb |        |
| cugugaccgucccauccuugU.                                                                                          |    | 21  | 1   |       | smb |        |
| cugugaccgucccauccuugU.                                                                                          |    | 2   | 1   |       | smb |        |
| cugugaccgucccauccuugcg.                                                                                         |    | 170 | 0   |       | smb |        |
| cugugaccgucccauccuuAcg.                                                                                         |    | 1   | 1   |       | smb |        |
| ugugaccgucccauccuug.                                                                                            |    | 1   | 0   |       | smb |        |
| ugugaccgucccauccuugcg.                                                                                          |    | 1   | 0   |       | smb |        |
| ugaccgucccauccuugcgga.                                                                                          |    | 1   | 0   |       | smb |        |
| ucagagugcgggaguccaac.                                                                                           |    | 3   | 0   |       | smb |        |
| ucagagugcgggaguccaacc.                                                                                          |    | 21  | 0   |       | smb |        |
| ucagagugcgggaguccaaccg.                                                                                         |    | 10  | 0   |       | smb |        |
| ucagagugcgggaguccaaccU.                                                                                         |    | 4   | 1   |       | smb |        |
| Ccaaggauugggauggucagagaa.                                                                                       |    | 1   | 1   |       | smb |        |
| caaggauugggauggucag.                                                                                            |    | 1   | 0   |       | smb |        |
| caaggauugggauggucagU.                                                                                           |    | 1   | 1   |       | smb |        |
| caaggauugggauggucaga.                                                                                           |    | 6   | 0   |       | smb |        |
| caaggauugggauggucagaU.                                                                                          |    | 8   | 1   |       | smb |        |
| caaggauugggauggucagaga.                                                                                         |    | 20  | 0   |       | smb |        |
| caaggUugggauggucagagaa.                                                                                         |    | 1   | 1   |       | smb |        |
| caaggauuggUauggucagagaa.                                                                                        |    | 1   | 1   |       | smb |        |

Star

Mature

|                                                                                                                    |      |   |     |
|--------------------------------------------------------------------------------------------------------------------|------|---|-----|
| auucugugaccgucccauccuugcggaucagcucccgucgucugucgucagagugcgggaguccaaaccgcaaggauagggaugguccagagaaaagcugaggcccaaggagga |      |   |     |
| .....caaggauaggauUgucagagaa.....                                                                                   | 1    | 1 | smb |
| .....caaggauAgggaugguccagagaa.....                                                                                 | 3    | 1 | smb |
| .....caaAgaugggaugguccagagaa.....                                                                                  | 1    | 1 | smb |
| .....caaggauagggaugguccagagaaG.....                                                                                | 2    | 1 | smb |
| .....caaggauagggaugguccagagaa.....                                                                                 | 3285 | 0 | smb |
| .....caaggauagggaGgguccagagaa.....                                                                                 | 1    | 1 | smb |
| .....caaggauagggaugguccagagaaU.....                                                                                | 20   | 1 | smb |
| .....cUaggauagggaugguccagagaa.....                                                                                 | 1    | 1 | smb |
| .....caaggauagggaugguccagagaa.....                                                                                 | 1    | 1 | smb |
| .....caaggauagggaugguccagaaCaa.....                                                                                | 1    | 1 | smb |
| .....caaggauagggaugguccagagaa.....                                                                                 | 3    | 1 | smb |
| .....caaggauagggaugguccagagaa.....                                                                                 | 3    | 1 | smb |
| .....caaggauagggaugguccagagaa.....                                                                                 | 1    | 1 | smb |
| .....caaggauagggaugguccagaaAaa.....                                                                                | 1    | 1 | smb |
| .....caaggauUggaugguccagagaa.....                                                                                  | 1    | 1 | smb |
| .....caaggauCgaugguccagagaa.....                                                                                   | 1    | 1 | smb |
| .....caaggauAgaugguccagagaa.....                                                                                   | 1    | 1 | smb |
| .....caaCgaugggaugguccagagaa.....                                                                                  | 1    | 1 | smb |
| .....caaggauagggaugguccagagaaU.....                                                                                | 222  | 1 | smb |
| .....caaggauagggaugguccagagaaC.....                                                                                | 1    | 1 | smb |
| .....caaggauagggaugguccagagaaUa.....                                                                               | 1    | 1 | smb |
| .....aaggauAgaugguccagaa.....                                                                                      | 1    | 1 | smb |
| .....aaggauagggaugguccagagaa.....                                                                                  | 10   | 0 | smb |
| .....cagagaaaagUgaggcc.....                                                                                        | 1    | 1 | smb |
| .....agagaaaagcugaggccU.....                                                                                       | 1    | 1 | smb |
| .....agagaaaagcugaggcccaag.....                                                                                    | 1    | 0 | smb |
| .....agagaaaagcugaggcccaagg.....                                                                                   | 6    | 0 | smb |
| .....gagaaaagcugaggcccaaU.....                                                                                     | 1    | 1 | smb |
| .....gagaaaagcugaggcccaagg.....                                                                                    | 1    | 0 | smb |
| .....gagaaaagcugaggcccaagga.....                                                                                   | 11   | 0 | smb |
| .....gagaaaagcugaggcccaaggaU.....                                                                                  | 1    | 1 | smb |

Provisional ID : 3827716\_145772\_4486416\_3800162+,,,3747241-\_26005  
Score total : 408.5  
Score for star read(s) : 3.9  
Score for read counts : 400.3  
Score for mfe : 3.2  
Score for randfold : 1.6  
Score for cons. seed : -0.6  
Total read count : 797  
Mature read count : 495  
Loop read count : 138  
Star read count : 164

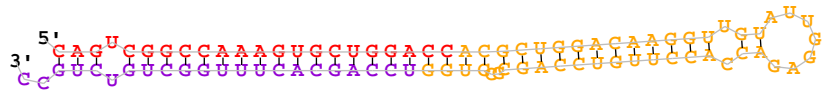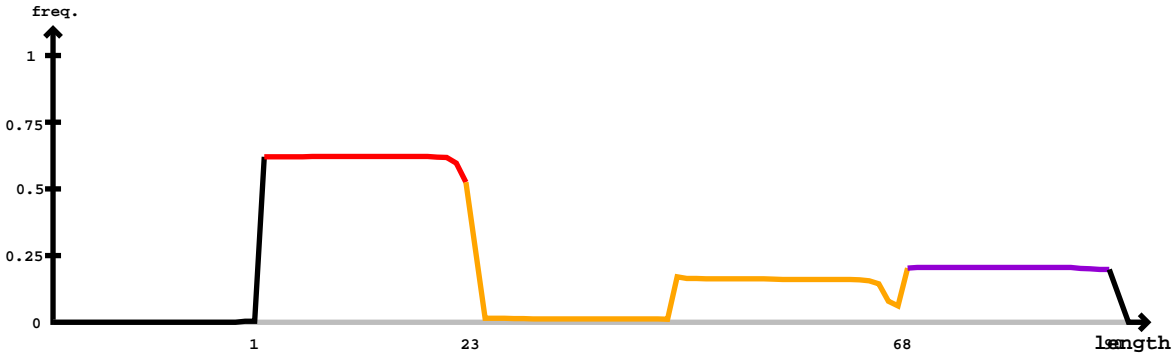

**Mature**

**Star**

| 5' -                                                                                                           |  |  | -3'                                                                                                             | obs | mm | sample |
|----------------------------------------------------------------------------------------------------------------|--|--|-----------------------------------------------------------------------------------------------------------------|-----|----|--------|
|                                                                                                                |  |  | exp                                                                                                             |     |    |        |
| gcccuugagagggguguggcagucggccaaagucuggaccacgcuggacaagguuguauuggagaccacuuuguccagcgcgugguccagcacuuuggcugucugccacu |  |  | gcccuuugagagggguguggcagucggccaaagucuggaccacgcuggacaagguuguauuggagaccacuuuguccagcgcgugguccagcacuuuggcugucugccacu |     |    |        |
| .....ggcagucggccaaagucugga.....                                                                                |  |  | .....ggcagucggccaaagucuggaccacgc.....                                                                           | 2   | 0  | smb    |
| .....ggcagucggccaaagucuggaccacgc.....                                                                          |  |  | .....ggcagucggccaaagucuggaccacgc.....                                                                           | 1   | 0  | smb    |
| .....cagucggccaaagucug.....                                                                                    |  |  | .....cagucggccaaagucug.....                                                                                     | 2   | 0  | smb    |
| .....cagucggccaaagucugU.....                                                                                   |  |  | .....cagucggccaaagucugU.....                                                                                    | 1   | 1  | smb    |
| .....cagucggccaaagucugga.....                                                                                  |  |  | .....cagucggccaaagucugga.....                                                                                   | 15  | 0  | smb    |
| .....cagucggccaaagucuggacc.....                                                                                |  |  | .....cagucggccaaagucuggacc.....                                                                                 | 1   | 1  | smb    |
| .....cagucggccaaagucuggacc.....                                                                                |  |  | .....cagucggccaaagucuggacc.....                                                                                 | 63  | 0  | smb    |
| .....Gagucggccaaagucuggacc.....                                                                                |  |  | .....Gagucggccaaagucuggacc.....                                                                                 | 1   | 1  | smb    |
| .....cagucggccaaagucuggacc.....                                                                                |  |  | .....cagucggccaaagucuggacc.....                                                                                 | 1   | 1  | smb    |
| .....cagucggccaaagucuggaccU.....                                                                               |  |  | .....cagucggccaaagucuggaccU.....                                                                                | 13  | 1  | smb    |
| .....cagucggccaaagucuggaGc.....                                                                                |  |  | .....cagucggccaaagucuggaGc.....                                                                                 | 1   | 1  | smb    |
| .....cagucggccaaagucuggacc.....                                                                                |  |  | .....cagucggccaaagucuggacc.....                                                                                 | 1   | 1  | smb    |
| .....cagucggccaaagucuggaccG.....                                                                               |  |  | .....cagucggccaaagucuggaccG.....                                                                                | 1   | 1  | smb    |
| .....cagucggccaaagucuggacc.....                                                                                |  |  | .....cagucggccaaagucuggacc.....                                                                                 | 371 | 0  | smb    |
| .....cagucggccaaagucuggaccU.....                                                                               |  |  | .....cagucggccaaagucuggaccU.....                                                                                | 21  | 1  | smb    |
| .....ggccaaagucuggaccacgcug.....                                                                               |  |  | .....ggccaaagucuggaccacgcug.....                                                                                | 1   | 0  | smb    |
| .....cacgcuggacaagguuguauu.....                                                                                |  |  | .....cacgcuggacaagguuguauu.....                                                                                 | 1   | 0  | smb    |
| .....cacgcuggacaagguuguauugg.....                                                                              |  |  | .....cacgcuggacaagguuguauugg.....                                                                               | 4   | 0  | smb    |
| .....cacgcuggacaagguuugAuuugg.....                                                                             |  |  | .....cacgcuggacaagguuugAuuugg.....                                                                              | 1   | 1  | smb    |
| .....cacgcuggacaagguuguauuggagaccacuu.....                                                                     |  |  | .....cacgcuggacaagguuguauuggagaccacuu.....                                                                      | 1   | 0  | smb    |
| .....acgcuggacaagguuguauu.....                                                                                 |  |  | .....acgcuggacaagguuguauu.....                                                                                  | 1   | 0  | smb    |
| .....acgcuggacaagguuguauuggag.....                                                                             |  |  | .....acgcuggacaagguuguauuggag.....                                                                              | 1   | 0  | smb    |
| .....acgcuggacaagguuguauuggagaccacuu.....                                                                      |  |  | .....acgcuggacaagguuguauuggagaccacuu.....                                                                       | 1   | 0  | smb    |
| .....gagaccacuuuguccagcgc.....                                                                                 |  |  | .....gagaccacuuuguccagcgc.....                                                                                  | 1   | 0  | smb    |
| .....gagaccacuuuguccagcgcg.....                                                                                |  |  | .....gagaccacuuuguccagcgcg.....                                                                                 | 3   | 0  | smb    |
| .....gagaccacuuuguccagcgcg.....                                                                                |  |  | .....gagaccacuuuguccagcgcg.....                                                                                 | 9   | 0  | smb    |
| .....gagaccacuuuguccagcgcgu.....                                                                               |  |  | .....gagaccacuuuguccagcgcgu.....                                                                                | 51  | 0  | smb    |
| .....gagaccacuuugCccagcgcgu.....                                                                               |  |  | .....gagaccacuuugCccagcgcgu.....                                                                                | 1   | 1  | smb    |
| .....gagaccacuuuguccagcgcgug.....                                                                              |  |  | .....gagaccacuuuguccagcgcgug.....                                                                               | 11  | 0  | smb    |
| .....gagaccacuuuguccagcgcgU.....                                                                               |  |  | .....gagaccacuuuguccagcgcgU.....                                                                                | 2   | 1  | smb    |
| .....gagaccacuuuguccagcgcguA.....                                                                              |  |  | .....gagaccacuuuguccagcgcguA.....                                                                               | 1   | 1  | smb    |
| .....gagaccacuuuguccagcgcgugC.....                                                                             |  |  | .....gagaccacuuuguccagcgcgugC.....                                                                              | 1   | 1  | smb    |
| .....gagaccacuuuguccagcgcgugA.....                                                                             |  |  | .....gagaccacuuuguccagcgcgugA.....                                                                              | 17  | 1  | smb    |

**Mature**

**Star**

|                                                                                                                 |     |   |     |
|-----------------------------------------------------------------------------------------------------------------|-----|---|-----|
| gcccuugagagggguguggcagucggccaaagugcuggaccaagcuggacaagguguaauuggagaccaccuuguccagcgcgugguccagcacuuuggcugucugccacu |     |   |     |
| .....gagaccaccuuguccagcgcgugg.....                                                                              | 7   | 0 | smb |
| .....gagaccaccuuguccagcgcgugU.....                                                                              | 24  | 1 | smb |
| .....uccagcacuuuggcuguc.....                                                                                    | 3   | 0 | smb |
| .....uccagcacuuuggcuguc.....                                                                                    | 1   | 0 | smb |
| .....uccagcacuuuggcuguc.....                                                                                    | 2   | 0 | smb |
| .....uccagcCcuuggcugucgcc...                                                                                    | 1   | 1 | smb |
| .....uccagcacuuuggcugucgcc...                                                                                   | 122 | 0 | smb |
| .....uccagcacuuuggcugucgccU..                                                                                   | 33  | 1 | smb |
| .....ccagcacuuuggcugucgcc...                                                                                    | 1   | 0 | smb |
| .....ccagcacuuuggcugucgccU..                                                                                    | 1   | 1 | smb |

Provisional ID : 3825705\_110890\_3256016\_3775388+,...,3760585+\_23769  
 Score total : 1035.6  
 Score for star read(s) : 3.9  
 Score for read counts : 1028.4  
 Score for mfe : 2.2  
 Score for randfold : 1.6  
 Score for cons. seed : -0.6  
 Total read count : 2029  
 Mature read count : 1115  
 Loop read count : 204  
 Star read count : 710

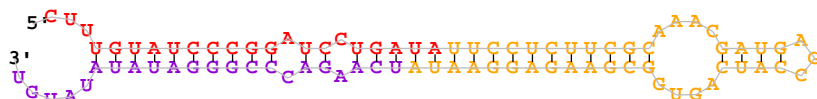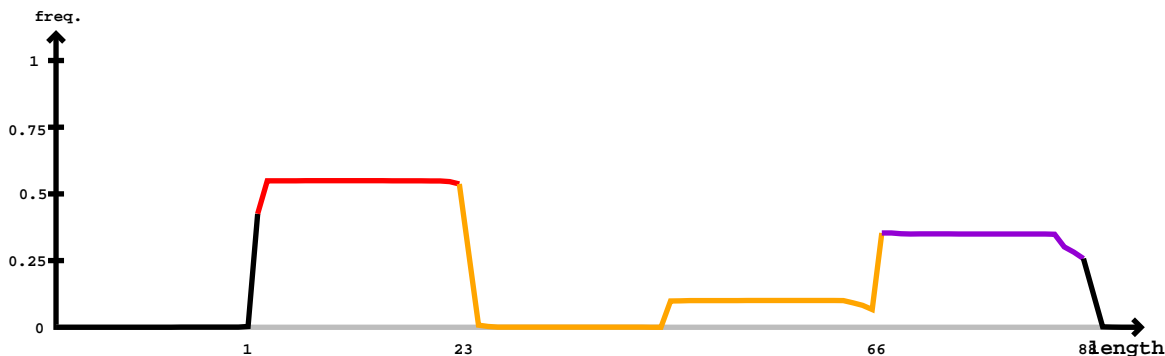

**Mature**

**Star**

| 5'                                                                                                                                          | 3' | obs | exp | reads | mm | sample |
|---------------------------------------------------------------------------------------------------------------------------------------------|----|-----|-----|-------|----|--------|
| cuggucaucucugcauaaac <u>cuuuguauc</u> ccggauc <u>cugaua</u> uuccucuucgcaaacgaugagccaucaguggcgaagaggaaua <u>ucaagacc</u> cgggauauauauguauuuc |    |     |     |       |    |        |
| .....((((.....(((((((((((.....((((((((((((((((.....((((.....)))))))))))))))))))))))))))))))))))))).....))))))..                             |    |     |     |       |    |        |
| .....ugcauaaccuuuguauc <u>ccgga</u> .....                                                                                                   |    | 1   | 0   |       |    | smb    |
| .....ccuuuguauc <u>ccggauc</u> cugau.....                                                                                                   |    | 5   | 0   |       |    | smb    |
| .....cuuuguauc <u>ccggauc</u> cu.....                                                                                                       |    | 1   | 0   |       |    | smb    |
| .....cuuuguauc <u>ccggauc</u> cuga.....                                                                                                     |    | 5   | 0   |       |    | smb    |
| .....cuuuguauc <u>ccggauc</u> cugau.....                                                                                                    |    | 13  | 0   |       |    | smb    |
| .....cuuuguauc <u>ccggauc</u> cugaua.....                                                                                                   |    | 736 | 0   |       |    | smb    |
| .....cuuuguauc <u>ccggauc</u> cugauU.....                                                                                                   |    | 1   | 1   |       |    | smb    |
| .....cuuuC <u>auc</u> ccggauc <u>cugaua</u> .....                                                                                           |    | 1   | 1   |       |    | smb    |
| .....cuuuguauc <u>ccggauc</u> Cg <u>aua</u> .....                                                                                           |    | 1   | 1   |       |    | smb    |
| .....cuuuguauc <u>ccggauc</u> cugU <u>ua</u> .....                                                                                          |    | 1   | 1   |       |    | smb    |
| .....cuuuguauc <u>ccggauc</u> cugauU <u>cgaua</u> .....                                                                                     |    | 1   | 1   |       |    | smb    |
| .....cCu <u>g</u> uauc <u>ccggauc</u> cugaua.....                                                                                           |    | 1   | 1   |       |    | smb    |
| .....cuuuguauc <u>ccggauc</u> cugauU <u>u</u> .....                                                                                         |    | 1   | 1   |       |    | smb    |
| .....cuuuguauc <u>ccAg</u> gauc <u>cugaua</u> u.....                                                                                        |    | 1   | 1   |       |    | smb    |
| .....cuuuguauc <u>ccggauc</u> cugaua <u>u</u> .....                                                                                         |    | 77  | 0   |       |    | smb    |
| .....cuuuguauc <u>ccggauc</u> cugaua <u>A</u> .....                                                                                         |    | 5   | 1   |       |    | smb    |
| .....cuuuguauc <u>ccggauc</u> cugauU <u>u</u> .....                                                                                         |    | 1   | 1   |       |    | smb    |
| .....cuuuguauc <u>ccggauc</u> cugaua <u>Au</u> .....                                                                                        |    | 1   | 1   |       |    | smb    |
| .....cuuuguauc <u>ccggauc</u> cugaua <u>UA</u> .....                                                                                        |    | 1   | 1   |       |    | smb    |
| .....cuuuguauc <u>ccggauc</u> cugaua <u>uu</u> .....                                                                                        |    | 5   | 0   |       |    | smb    |
| .....cuuuguauc <u>ccggauc</u> cugaua <u>uuU</u> .....                                                                                       |    | 5   | 1   |       |    | smb    |
| .....uuuguauc <u>ccggauc</u> cugaua.....                                                                                                    |    | 27  | 0   |       |    | smb    |
| .....uuuguauc <u>ccU</u> ggauc <u>cugaua</u> u.....                                                                                         |    | 1   | 1   |       |    | smb    |
| .....uuuguauc <u>ccggauc</u> cugaua <u>u</u> .....                                                                                          |    | 221 | 0   |       |    | smb    |
| .....uuuguauc <u>ccggauc</u> cugaua <u>UC</u> .....                                                                                         |    | 1   | 1   |       |    | smb    |
| .....uuuguauc <u>ccggauc</u> cugaua <u>uu</u> .....                                                                                         |    | 1   | 0   |       |    | smb    |
| .....u <u>auc</u> ccggauc <u>cugaua</u> u.....                                                                                              |    | 1   | 0   |       |    | smb    |
| .....uuccucuucgcaaacgaug.....                                                                                                               |    | 1   | 0   |       |    | smb    |
| .....ccaucaguggcgaagag <u>A</u> .....                                                                                                       |    | 1   | 1   |       |    | smb    |
| .....ccaucaguggcgaagagga.....                                                                                                               |    | 16  | 0   |       |    | smb    |
| .....ccaucaguggcgaagag <u>U</u> .....                                                                                                       |    | 1   | 1   |       |    | smb    |
| .....ccaucaguggcgaagagga.....                                                                                                               |    | 16  | 0   |       |    | smb    |
| .....ccaucaguggcgaagagga <u>U</u> .....                                                                                                     |    | 3   | 1   |       |    | smb    |

Mature

Star

| Sequence                                                                                                 | Count | Score | Label |
|----------------------------------------------------------------------------------------------------------|-------|-------|-------|
| cuggucaucucugcauaaccuuuguaucgccgaucugauuuuccucucgcaaacgaugagccaucaguggcgaagaggaauucaagaccgggauuuauuguauc | 33    | 0     | smb   |
| .....ccaucaguggcgaagaggaau.....                                                                          | 104   | 0     | smb   |
| .....ccaucaguggcgaagaggaau.....                                                                          | 1     | 1     | smb   |
| .....ccaucagugAgcgaagaggaau.....                                                                         | 13    | 1     | smb   |
| .....ccaucaguggcgaagaggaauU.....                                                                         | 1     | 1     | smb   |
| .....ccaucaguggcgaagaggaauA.....                                                                         | 3     | 0     | smb   |
| .....ccaucaguggcgaagaggaauuc.....                                                                        | 2     | 0     | smb   |
| .....ccaucaguggcgaagaggaauUc.....                                                                        | 1     | 1     | smb   |
| .....ccaucaguggcgaagaggaauU.....                                                                         | 3     | 1     | smb   |
| .....ccaucaguggcgaagaggaauUA.....                                                                        | 2     | 1     | smb   |
| .....caucaguggcgaagaggaauu.....                                                                          | 1     | 0     | smb   |
| .....aucaguggcgaagaggaauuc.....                                                                          | 2     | 0     | smb   |
| .....ggcgaagaggaauucaagacc.....                                                                          | 1     | 0     | smb   |
| .....aucaagaccgggauuuua.....                                                                             | 1     | 0     | smb   |
| .....ucaagaccgggauuuu.....                                                                               | 2     | 0     | smb   |
| .....ucaagaccgggauuuU.....                                                                               | 1     | 1     | smb   |
| .....ucaagaccgggauuuua.....                                                                              | 92    | 0     | smb   |
| .....ucaagaccgggauCuua.....                                                                              | 1     | 1     | smb   |
| .....ucaagaGccgggauuuua.....                                                                             | 1     | 1     | smb   |
| .....ucaagaccgggauuuuu.....                                                                              | 37    | 0     | smb   |
| .....ucaagaccgggauuuuGu.....                                                                             | 1     | 1     | smb   |
| .....ucaUgaccgggauuuuuug.....                                                                            | 1     | 1     | smb   |
| .....ucaagaccgggauuuuuuA.....                                                                            | 1     | 1     | smb   |
| .....ucaagaccgggauuuuuug.....                                                                            | 47    | 0     | smb   |
| .....ucaagacUcgggauuuuuug.....                                                                           | 1     | 1     | smb   |
| .....ucaagaccgggauuuuuuug.....                                                                           | 490   | 0     | smb   |
| .....ucaagaccgggauuuuuuA.....                                                                            | 2     | 1     | smb   |
| .....ucaagaccgggauuuuuuugA.....                                                                          | 1     | 1     | smb   |
| .....ucGagaccgggauuuuuuug.....                                                                           | 1     | 1     | smb   |
| .....ucaagaccgggauuuuuuuguu.....                                                                         | 19    | 0     | smb   |
| .....ucaagaccgggauuuuuuuguuU.....                                                                        | 2     | 1     | smb   |
| .....ucaagaccgggauuuuuuuguuUu.....                                                                       | 1     | 1     | smb   |
| .....caagaccgggauuuuuu.....                                                                              | 2     | 0     | smb   |
| .....caagaccgggauuuuuU.....                                                                              | 1     | 1     | smb   |
| .....caagaccgggauuuuuuug.....                                                                            | 1     | 0     | smb   |
| .....caagaccgggauuuuuuugA.....                                                                           | 1     | 1     | smb   |
| .....aagaccgggauuuuuuug.....                                                                             | 2     | 0     | smb   |
| .....gaccgggauuuuuuug.....                                                                               | 1     | 0     | smb   |





Provisional ID : 3820413\_148141\_4772246\_3694007-.....,3789038+\_15956  
Score total : 6625.4  
Score for star read(s) : 3.9  
Score for read counts : 6618.2  
Score for mfe : 2.3  
Score for randfold : 1.6  
Score for cons. seed : -0.6  
Total read count : 12993  
Mature read count : 12833  
Loop read count : 0  
Star read count : 160

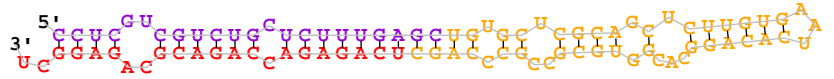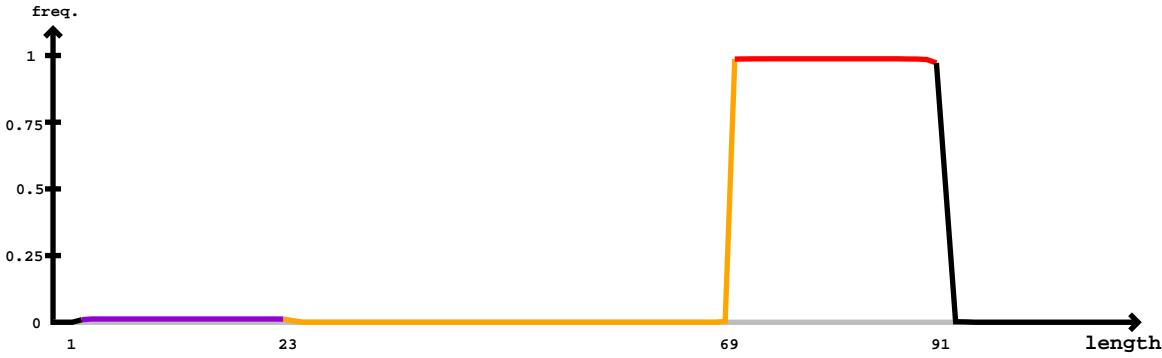

Star

Mature

| 5' -                                                                                                                                                                                    | 3'  | obs | exp | reads | mm | sample |
|-----------------------------------------------------------------------------------------------------------------------------------------------------------------------------------------|-----|-----|-----|-------|----|--------|
| <b>g</b> ccucgucgucgucucuuagagc <b>u</b> gugcucgcagcucuuugugaauca <b>g</b> gca <b>c</b> ggugcgcgcgcccagc <b>u</b> cagagaccagacgcagagg <b>cu</b> ugcagcccucagcgc <b>g</b> caaag <b>g</b> | -3' | obs | exp | reads | mm | sample |
| gccucgucgucgucucuuagagcugugcucgcagcucuuugugaaucaaggcaaggugcgcgcgcccagcucagagaccagacgcagaggcuugcagcccucagcgcgcaaagg                                                                      |     |     |     | 4     | 0  | smb    |
| (((((.....)))))).....                                                                                                                                                                   |     |     |     | 119   | 0  | smb    |
| .ccucgucgucgucucuuagag.....                                                                                                                                                             |     |     |     | 1     | 1  | smb    |
| .ccucgucgucgucucuuagagc.....                                                                                                                                                            |     |     |     | 2     | 0  | smb    |
| .cucgucgucgucucuuagagA.....                                                                                                                                                             |     |     |     | 1     | 1  | smb    |
| .cucgucgucgucucuuagagc.....                                                                                                                                                             |     |     |     | 11    | 0  | smb    |
| .cucgucgucgucucuuagagcu.....                                                                                                                                                            |     |     |     | 20    | 0  | smb    |
| .cucgucgucgucucuuagagcU.....                                                                                                                                                            |     |     |     | 1     | 1  | smb    |
| .cucgucgucgucucuuagagcuU.....                                                                                                                                                           |     |     |     | 1     | 1  | smb    |
| .....Cucagagaccagacgcagaga.....                                                                                                                                                         |     |     |     | 2     | 0  | smb    |
| .....cucUgagaccagacgcagaggc.....                                                                                                                                                        |     |     |     | 1     | 1  | smb    |
| .....cucagagaccagacgcagaggc.....                                                                                                                                                        |     |     |     | 39    | 0  | smb    |
| .....CucagagaccagacgcagaggU.....                                                                                                                                                        |     |     |     | 1     | 1  | smb    |
| .....ucagagaccagacgcagaga.....                                                                                                                                                          |     |     |     | 7     | 0  | smb    |
| .....ucagagaccagacgcagag.....                                                                                                                                                           |     |     |     | 3     | 0  | smb    |
| .....ucagagaccagacgcagagg.....                                                                                                                                                          |     |     |     | 24    | 0  | smb    |
| .....ucagagaccagacgcagagU.....                                                                                                                                                          |     |     |     | 1     | 1  | smb    |
| .....ucagagaccagacgcagaggc.....                                                                                                                                                         |     |     |     | 115   | 0  | smb    |
| .....ucagagaccagacgcagaggU.....                                                                                                                                                         |     |     |     | 1     | 1  | smb    |
| .....ucagagaccagacgcagaggc.....                                                                                                                                                         |     |     |     | 1     | 1  | smb    |
| .....ucagagaccagacgcagaggc.....                                                                                                                                                         |     |     |     | 1     | 1  | smb    |
| .....ucagagaccagacgcagaggc.....                                                                                                                                                         |     |     |     | 1     | 1  | smb    |
| .....ucagagaccagacgcagaggc.....                                                                                                                                                         |     |     |     | 1     | 1  | smb    |
| .....ucagagaccagacgcagaggc.....                                                                                                                                                         |     |     |     | 1     | 1  | smb    |
| .....ucagagaccagacgcagaggc.....                                                                                                                                                         |     |     |     | 1     | 1  | smb    |
| .....ucagagaccagacgcagaggc.....                                                                                                                                                         |     |     |     | 1     | 1  | smb    |
| .....ucagagaccagacgcagaggc.....                                                                                                                                                         |     |     |     | 1     | 1  | smb    |
| .....ucagagaccagacgcagaggc.....                                                                                                                                                         |     |     |     | 18    | 1  | smb    |
| .....ucagagaccagacgcagaggc.....                                                                                                                                                         |     |     |     | 1     | 1  | smb    |
| .....ucagagaccagacgcagaggc.....                                                                                                                                                         |     |     |     | 4     | 1  | smb    |
| .....ucagagaccagacgcagaggc.....                                                                                                                                                         |     |     |     | 1     | 1  | smb    |
| .....ucagagaccagacgcagaggc.....                                                                                                                                                         |     |     |     | 12341 | 0  | smb    |
| .....ucagagaccagacgcagaggc.....                                                                                                                                                         |     |     |     | 1     | 1  | smb    |
| .....ucaCagaccagacgcagaggcu.....                                                                                                                                                        |     |     |     | 1     | 1  | smb    |

Star

Mature

|                                                                                                                   |     |   |     |
|-------------------------------------------------------------------------------------------------------------------|-----|---|-----|
| gcccugucgucugcucuuugagcugugcucgcagcucuuugugaaucacaggcaccggugcgccgcccagcucagagaccagacgcagagggcuugcagccucagcgcaaagg |     |   |     |
| .....ucagagaccagacgcagagCcu.....                                                                                  | 1   | 1 | smb |
| .....ucagagaccagacgcagagggG.....                                                                                  | 158 | 1 | smb |
| .....ucagagaccagacgcGgagggcu.....                                                                                 | 1   | 1 | smb |
| .....ucagagaccagacgcagCggcu.....                                                                                  | 1   | 1 | smb |
| .....ucagagaUcagacgcagagggcu.....                                                                                 | 1   | 1 | smb |
| .....ucagagaccagacgcagagAcu.....                                                                                  | 1   | 1 | smb |
| .....ucagagaccaAacgcagagggcu.....                                                                                 | 1   | 1 | smb |
| .....ucagagaccagacgcagCggcu.....                                                                                  | 2   | 1 | smb |
| .....ucagagaccagacgcUgagggcu.....                                                                                 | 2   | 1 | smb |
| .....ucagagGccagacgcagagggcu.....                                                                                 | 2   | 1 | smb |
| .....ucagagUccagacgcagagggcu.....                                                                                 | 1   | 1 | smb |
| .....Ccagagaccagacgcagagggcu.....                                                                                 | 1   | 1 | smb |
| .....ucagagaccagacUcagagggcu.....                                                                                 | 8   | 1 | smb |
| .....ucagagaccagacAcagagggcu.....                                                                                 | 2   | 1 | smb |
| .....ucagagacGagacgcagagggcu.....                                                                                 | 1   | 1 | smb |
| .....ucagagacUgacgcagagggcu.....                                                                                  | 3   | 1 | smb |
| .....ucagGgaccagacgcagagggcu.....                                                                                 | 2   | 1 | smb |
| .....ucagagaccUgacgcagagggcu.....                                                                                 | 1   | 1 | smb |
| .....ucagagaccagacgcagagggUu.....                                                                                 | 2   | 1 | smb |
| .....ucGgagaccagacgcagagggcu.....                                                                                 | 5   | 1 | smb |
| .....ucagagaccagacgcagaUgcu.....                                                                                  | 1   | 1 | smb |
| .....ucagagaccagacgcaCagggcu.....                                                                                 | 2   | 1 | smb |
| .....ucagagaccaUacgcagagggcu.....                                                                                 | 1   | 1 | smb |
| .....ucagagaccagacgcagagggA.....                                                                                  | 1   | 1 | smb |
| .....ucagagaccagaUgcagagggcu.....                                                                                 | 4   | 1 | smb |
| .....ucagagaccagacgcaAagggcu.....                                                                                 | 1   | 1 | smb |
| .....ucagagaccagGcgcagagggcu.....                                                                                 | 2   | 1 | smb |
| .....ucagUgaccagacgcagagggcu.....                                                                                 | 1   | 1 | smb |
| .....ucagagaccagacgcagagggcuu.....                                                                                | 19  | 0 | smb |
| .....ucGgagaccagacgcagagggcuu.....                                                                                | 1   | 1 | smb |
| .....ucagagaccagacgcagagggcuug.....                                                                               | 5   | 0 | smb |
| .....ucagagaccagacgcagagggcuugG.....                                                                              | 18  | 1 | smb |
| .....cagagaccagacgcagagggc.....                                                                                   | 1   | 0 | smb |
| .....cagagaccagacgcagagggcu.....                                                                                  | 5   | 0 | smb |
| .....cagagaccagacgcagagggcuu.....                                                                                 | 1   | 0 | smb |
| .....agagaccagacgcagagggcu.....                                                                                   | 5   | 0 | smb |
| .....agaccagacgcagagggcu.....                                                                                     | 1   | 0 | smb |



Provisional ID : 3820890\_9358\_73507\_3700889+,3849N,3809352+\_16662  
 Score total : 2816.4  
 Score for star read(s) : 3.9  
 Score for read counts : 2808.2  
 Score for mfe : 2.7  
 Score for randfold : 1.6  
 Score for cons. seed :  
 Total read count : 5520  
 Mature read count : 3094  
 Loop read count : 345  
 Star read count : 2081

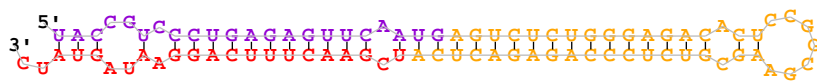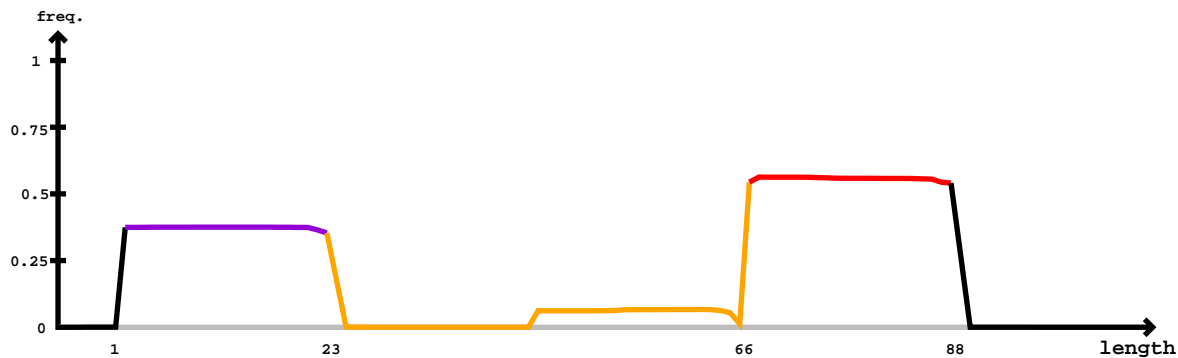

**Star**

**Mature**

| 5' -                                                                                                                                  | -3' | obs  | exp | reads | mm | sample |
|---------------------------------------------------------------------------------------------------------------------------------------|-----|------|-----|-------|----|--------|
| acgga <u>uaccguccugagagucaau</u> gagucucugggagacacuccggcgaagcgucuccagagacucau <u>cgaacuuucaggaau</u> aguauccgucccgaggguucucgcc        |     |      |     |       |    |        |
| acgga <u>uaccguccugagagucaau</u> gagucucugggagacacuccggcgaagcgucuccagagacucau <u>cgaacuuucaggaau</u> aguauccgucccgaggguucucgcc        |     |      |     |       |    |        |
| ((((((((.(.(((((((((.((((((((((((((((.(. ....)).)))))))))))))))))))).)))))))).(((((.....))))).))                                      |     |      |     |       |    |        |
| .cgga <u>uaccguccugagagucaau</u> gagucucugggagacacuccggcgaagcgucuccagagacucau <u>cgaacuuucaggaau</u> aguauccgucccgaggguucucgcc        |     | 2    | 0   |       |    | smb    |
| . . . . . <u>uaccguccugagagucaau</u> gagucucugggagacacuccggcgaagcgucuccagagacucau <u>cgaacuuucaggaau</u> aguauccgucccgaggguucucgcc    |     | 3    | 0   |       |    | smb    |
| . . . . . <u>uaccguccugagagucaau</u> gagucucugggagacacuccggcgaagcgucuccagagacucau <u>cgaacuuucaggaau</u> aguauccgucccgaggguucucgcc    |     | 51   | 0   |       |    | smb    |
| . . . . . <u>uaccguccugagagucaau</u> gagucucugggagacacuccggcgaagcgucuccagagacucau <u>cgaacuuucaggaau</u> aguauccgucccgaggguucucgcc    |     | 1    | 1   |       |    | smb    |
| . . . . . <u>uaccguccugagagucaau</u> gagucucugggagacacuccggcgaagcgucuccagagacucau <u>cgaacuuucaggaau</u> aguauccgucccgaggguucucgcc    |     | 64   | 0   |       |    | smb    |
| . . . . . <u>uaccguccCgagagucaau</u> gagucucugggagacacuccggcgaagcgucuccagagacucau <u>cgaacuuucaggaau</u> aguauccgucccgaggguucucgcc    |     | 1    | 1   |       |    | smb    |
| . . . . . <u>uaccUuccugagagucaau</u> gagucucugggagacacuccggcgaagcgucuccagagacucau <u>cgaacuuucaggaau</u> aguauccgucccgaggguucucgcc    |     | 1    | 1   |       |    | smb    |
| . . . . . <u>uaccguccugagagucaau</u> gagucucugggagacacuccggcgaagcgucuccagagacucau <u>cgaacuuucaggaau</u> aguauccgucccgaggguucucgcc    |     | 1    | 1   |       |    | smb    |
| . . . . . <u>Caccguccugagagucaau</u> gagucucugggagacacuccggcgaagcgucuccagagacucau <u>cgaacuuucaggaau</u> aguauccgucccgaggguucucgcc    |     | 1    | 1   |       |    | smb    |
| . . . . . <u>uUccguccugagagucaau</u> gagucucugggagacacuccggcgaagcgucuccagagacucau <u>cgaacuuucaggaau</u> aguauccgucccgaggguucucgcc    |     | 1    | 1   |       |    | smb    |
| . . . . . <u>uaccAuccugagagucaau</u> gagucucugggagacacuccggcgaagcgucuccagagacucau <u>cgaacuuucaggaau</u> aguauccgucccgaggguucucgcc    |     | 3    | 1   |       |    | smb    |
| . . . . . <u>uaccgucccugGgagagucaau</u> gagucucugggagacacuccggcgaagcgucuccagagacucau <u>cgaacuuucaggaau</u> aguauccgucccgaggguucucgcc |     | 3    | 1   |       |    | smb    |
| . . . . . <u>uaccguccugagagucaau</u> gagucucugggagacacuccggcgaagcgucuccagagacucau <u>cgaacuuucaggaau</u> aguauccgucccgaggguucucgcc    |     | 1    | 1   |       |    | smb    |
| . . . . . <u>uaccguccugagagucaau</u> gagucucugggagacacuccggcgaagcgucuccagagacucau <u>cgaacuuucaggaau</u> aguauccgucccgaggguucucgcc    |     | 5    | 1   |       |    | smb    |
| . . . . . <u>uaccguccugagagucaau</u> gagucucugggagacacuccggcgaagcgucuccagagacucau <u>cgaacuuucaggaau</u> aguauccgucccgaggguucucgcc    |     | 1    | 1   |       |    | smb    |
| . . . . . <u>uaccgucccugGgagagucaau</u> gagucucugggagacacuccggcgaagcgucuccagagacucau <u>cgaacuuucaggaau</u> aguauccgucccgaggguucucgcc |     | 1    | 1   |       |    | smb    |
| . . . . . <u>uaccguccugagagucaau</u> gagucucugggagacacuccggcgaagcgucuccagagacucau <u>cgaacuuucaggaau</u> aguauccgucccgaggguucucgcc    |     | 1    | 1   |       |    | smb    |
| . . . . . <u>uaccgucccugGgagagucaau</u> gagucucugggagacacuccggcgaagcgucuccagagacucau <u>cgaacuuucaggaau</u> aguauccgucccgaggguucucgcc |     | 1    | 1   |       |    | smb    |
| . . . . . <u>uaccguccugagagucaau</u> gagucucugggagacacuccggcgaagcgucuccagagacucau <u>cgaacuuucaggaau</u> aguauccgucccgaggguucucgcc    |     | 2    | 1   |       |    | smb    |
| . . . . . <u>uaccgucccugGgagagucaau</u> gagucucugggagacacuccggcgaagcgucuccagagacucau <u>cgaacuuucaggaau</u> aguauccgucccgaggguucucgcc |     | 1876 | 0   |       |    | smb    |
| . . . . . <u>uaccgucccugGgagagucaau</u> gagucucugggagacacuccggcgaagcgucuccagagacucau <u>cgaacuuucaggaau</u> aguauccgucccgaggguucucgcc |     | 2    | 1   |       |    | smb    |
| . . . . . <u>uaccgucccugGgagagucaau</u> gagucucugggagacacuccggcgaagcgucuccagagacucau <u>cgaacuuucaggaau</u> aguauccgucccgaggguucucgcc |     | 1    | 1   |       |    | smb    |
| . . . . . <u>uaccgucccugGgagagucaau</u> gagucucugggagacacuccggcgaagcgucuccagagacucau <u>cgaacuuucaggaau</u> aguauccgucccgaggguucucgcc |     | 1    | 1   |       |    | smb    |
| . . . . . <u>uaccgucccugGgagagucaau</u> gagucucugggagacacuccggcgaagcgucuccagagacucau <u>cgaacuuucaggaau</u> aguauccgucccgaggguucucgcc |     | 3    | 0   |       |    | smb    |
| . . . . . <u>uaccgucccugGgagagucaau</u> gagucucugggagacacuccggcgaagcgucuccagagacucau <u>cgaacuuucaggaau</u> aguauccgucccgaggguucucgcc |     | 48   | 1   |       |    | smb    |
| . . . . . <u>uaccgucccugGgagagucaau</u> gagucucugggagacacuccggcgaagcgucuccagagacucau <u>cgaacuuucaggaau</u> aguauccgucccgaggguucucgcc |     | 2    | 1   |       |    | smb    |
| . . . . . <u>uaccgucccugGgagagucaau</u> gagucucugggagacacuccggcgaagcgucuccagagacucau <u>cgaacuuucaggaau</u> aguauccgucccgaggguucucgcc |     | 1    | 1   |       |    | smb    |
| . . . . . <u>uaccgucccugGgagagucaau</u> gagucucugggagacacuccggcgaagcgucuccagagacucau <u>cgaacuuucaggaau</u> aguauccgucccgaggguucucgcc |     | 2    | 0   |       |    | smb    |
| . . . . . <u>uaccgucccugGgagagucaau</u> gagucucugggagacacuccggcgaagcgucuccagagacucau <u>cgaacuuucaggaau</u> aguauccgucccgaggguucucgcc |     | 1    | 0   |       |    | smb    |
| . . . . . <u>uaccgucccugGgagagucaau</u> gagucucugggagacacuccggcgaagcgucuccagagacucau <u>cgaacuuucaggaau</u> aguauccgucccgaggguucucgcc |     | 3    | 0   |       |    | smb    |
| . . . . . <u>uaccgucccugGgagagucaau</u> gagucucugggagacacuccggcgaagcgucuccagagacucau <u>cgaacuuucaggaau</u> aguauccgucccgaggguucucgcc |     | 1    | 0   |       |    | smb    |
| . . . . . <u>uaccgucccugGgagagucaau</u> gagucucugggagacacuccggcgaagcgucuccagagacucau <u>cgaacuuucaggaau</u> aguauccgucccgaggguucucgcc |     | 1    | 0   |       |    | smb    |
| . . . . . <u>uaccgucccugGgagagucaau</u> gagucucugggagacacuccggcgaagcgucuccagagacucau <u>cgaacuuucaggaau</u> aguauccgucccgaggguucucgcc |     | 3    | 0   |       |    | smb    |
| . . . . . <u>uaccgucccugGgagagucaau</u> gagucucugggagacacuccggcgaagcgucuccagagacucau <u>cgaacuuucaggaau</u> aguauccgucccgaggguucucgcc |     | 1    | 0   |       |    | smb    |

Star

Mature

acggauaccgucuccgagaguucaaugagucucugggagacacucoggcgaagcgucuccagagacucaucgaacuuucaggaauguauccgucuccggagguucucgcc

|                                            |      |   |     |
|--------------------------------------------|------|---|-----|
| .....cgaagcgucuccagagU.....                | 1    | 1 | smb |
| .....cgaagcgucuccagaga.....                | 2    | 0 | smb |
| .....cgaagcgucuccaUagac.....               | 1    | 1 | smb |
| .....cgaagcgucuccagagac.....               | 17   | 0 | smb |
| .....cgaagcgucuccagagaU.....               | 1    | 1 | smb |
| .....cgaagcgucuccagagacu.....              | 48   | 0 | smb |
| .....cgaagcgucuccagaUacuc.....             | 2    | 1 | smb |
| .....cgaagcgucuccagagacuc.....             | 225  | 0 | smb |
| .....cgaagcgucuccagagacuU.....             | 4    | 1 | smb |
| .....cgaagcgucuccagagacuca.....            | 33   | 0 | smb |
| .....cgaagcgucuccagagacuU.....             | 5    | 1 | smb |
| .....cgaagcgucuccagagacuauU.....           | 2    | 1 | smb |
| .....ucuccagagacucaucgaac.....             | 1    | 0 | smb |
| .....ucuccagagacucaucgaacu.....            | 3    | 0 | smb |
| .....ucuccagagacucaucgaacuuucaggaaua.....  | 1    | 0 | smb |
| .....ucuccagagacucaucgaacuu.....           | 1    | 0 | smb |
| .....ucuccagagacucaucgaacu.....            | 4    | 0 | smb |
| .....ucuccagagacucaucgaacuu.....           | 3    | 0 | smb |
| .....ucuccagagacucaucgaacuuu.....          | 8    | 0 | smb |
| .....ucuccagagacucaucgaacuuuU.....         | 1    | 1 | smb |
| .....uccagagacucaucgaacu.....              | 1    | 0 | smb |
| .....uccagagacucaucgaacuuuc.....           | 1    | 0 | smb |
| .....agagacucaucgaacuuucagg.....           | 1    | 0 | smb |
| .....agagacucaucgaacuuucaggaaugu.....      | 1    | 0 | smb |
| .....gagacucaucgaacuuucagga.....           | 1    | 0 | smb |
| .....acucaucgaacuuucagga.....              | 1    | 0 | smb |
| .....caucgaacuuucaggaauguau.....           | 1    | 0 | smb |
| .....caucgaacuuucaggaauguauccgucuccgg..... | 1    | 0 | smb |
| .....ucgaacuuucaggaaug.....                | 8    | 0 | smb |
| .....ucgaacuuucaggaaugu.....               | 4    | 0 | smb |
| .....ucgaacuuucaCgaauagua.....             | 1    | 1 | smb |
| .....ucgaacuuucaggaauguau.....             | 63   | 0 | smb |
| .....ucgaacuuucaggaauguU.....              | 1    | 1 | smb |
| .....ucgaacuuucaggaauguau.....             | 14   | 0 | smb |
| .....ucgaacuuucaggaauguCu.....             | 1    | 1 | smb |
| .....ucgaaUuuucaggaauguaucc.....           | 1    | 1 | smb |
| .....ucgaacuuucaggaauaAuauc.....           | 1    | 1 | smb |
| .....ucgaacuuucaggaaUGuaguaucc.....        | 1    | 1 | smb |
| .....ucgaacuuucaggaauguaucc.....           | 1    | 1 | smb |
| .....ucgaacuuucaggaaUGuaucc.....           | 6    | 1 | smb |
| .....ucgaacuuucaggaauguUuc.....            | 2    | 1 | smb |
| .....ucgaacuuucaggaauguaucc.....           | 2618 | 0 | smb |
| .....ucgGacuucaggaauguaucc.....            | 1    | 1 | smb |
| .....Cggaacuuucaggaauguaucc.....           | 1    | 1 | smb |
| .....ucgaacuuucaggaaUuauc.....             | 3    | 1 | smb |
| .....ucgaacuuucaggaaugCauc.....            | 1    | 1 | smb |
| .....ucgaacuuucaUgaauguaucc.....           | 2    | 1 | smb |
| .....ucgaacuuucGgaauguaucc.....            | 2    | 1 | smb |
| .....ucgaacuuucaggaaAaguaucc.....          | 1    | 1 | smb |
| .....ucgaacuuucaggGauaguaucc.....          | 1    | 1 | smb |
| .....ucgaacuuucaggaaUGuaucc.....           | 1    | 1 | smb |
| .....ucgaacuuucaggaauguauccU.....          | 217  | 1 | smb |
| .....ucgaacuuucaggaauguauccA.....          | 1    | 1 | smb |
| .....ucgaacuuucaggaauguaucc.....           | 31   | 0 | smb |
| .....cgaacuuucagCaauaguaucc.....           | 1    | 1 | smb |
| .....cgaacuuucaggaauguaucc.....            | 104  | 0 | smb |

Provisional ID : 3818239\_11905\_99070\_3179782+,...,3760891+\_13197  
 Score total : 3046.9  
 Score for star read(s) : 3.9  
 Score for read counts : 3038.7  
 Score for mfe : 3.3  
 Score for randfold : 1.6  
 Score for cons. seed : -0.6  
 Total read count : 5972  
 Mature read count : 5409  
 Loop read count : 151  
 Star read count : 412

5' A C A G A A G G C C A A U C U G U U G C U G C G G U G G A G A C G G A A A C A A G G A A A A G G  
 3' U G U C U U C C G G U U A G A G C A A C G A C G G C A C C U C U C C C U U U G U U U U G

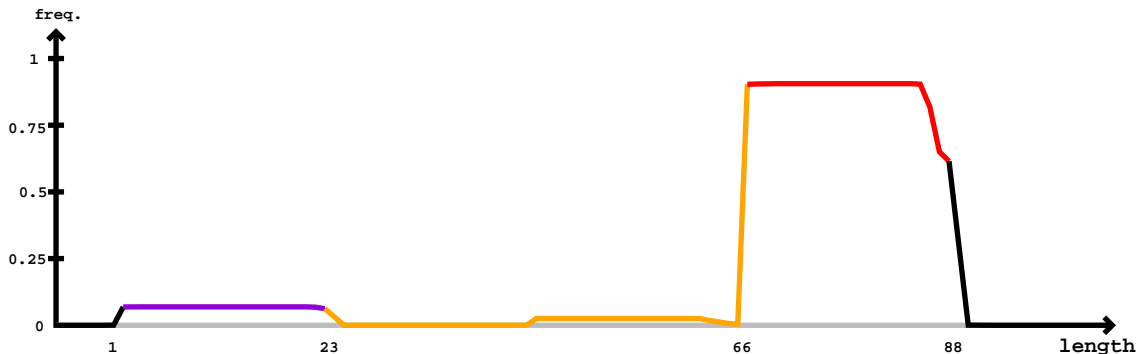

Star

Mature

| 5'                                                                                                          | 3' | obs | exp | reads | mm | sample |
|-------------------------------------------------------------------------------------------------------------|----|-----|-----|-------|----|--------|
| aaagcacaagaaggccaauucguugcugccguggagacggaacaaaguuuguuuucgucuccacggcagcaacgagauuggccuucugugcuuuggacauugaaaca |    |     |     |       |    |        |
| (((.....))))).....                                                                                          |    |     |     |       |    |        |
| ...cacagaaggccaauucguugc.....                                                                               |    | 1   | 0   | 1     | 0  | smb    |
| ...cacagaaggccaauucguugc.....                                                                               |    | 1   | 0   | 1     | 0  | smb    |
| ...acagaaggccaauucguug.....                                                                                 |    | 5   | 0   | 5     | 0  | smb    |
| ...acagaaggccaauucguugU.....                                                                                |    | 3   | 1   | 3     | 1  | smb    |
| ...acagaaggccaauucguugc.....                                                                                |    | 30  | 0   | 30    | 0  | smb    |
| ...acagaagCccaauucguugcu.....                                                                               |    | 1   | 1   | 1     | 1  | smb    |
| ...acagaaggccaauucguugcC.....                                                                               |    | 1   | 1   | 1     | 1  | smb    |
| ...acagaaggccaauucguugcu.....                                                                               |    | 366 | 0   | 366   | 0  | smb    |
| ...acagaaggccaauucguugcu.....                                                                               |    | 1   | 1   | 1     | 1  | smb    |
| ...acagaaggccaauucguugcG.....                                                                               |    | 1   | 1   | 1     | 1  | smb    |
| ...cagaaggccaauucguuU.....                                                                                  |    | 1   | 1   | 1     | 1  | smb    |
| ...agaaggccaauucguugcu.....                                                                                 |    | 1   | 0   | 1     | 0  | smb    |
| ...uuuguuucgucuccacg.....                                                                                   |    | 42  | 0   | 42    | 0  | smb    |
| ...uuuguuucgucCccacg.....                                                                                   |    | 1   | 1   | 1     | 1  | smb    |
| ...uuuguuucgucuccacgU.....                                                                                  |    | 7   | 1   | 7     | 1  | smb    |
| ...uuuguuucgucuccacgg.....                                                                                  |    | 26  | 0   | 26    | 0  | smb    |
| ...uuuguuucgucuccacggU.....                                                                                 |    | 1   | 1   | 1     | 1  | smb    |
| ...uuuguuucgucuccacggc.....                                                                                 |    | 33  | 0   | 33    | 0  | smb    |
| ...uuuguuucgucuccacggcU.....                                                                                |    | 3   | 1   | 3     | 1  | smb    |
| ...uuuguuucgucuccacggca.....                                                                                |    | 13  | 0   | 13    | 0  | smb    |
| ...uuuguuucgucuccacggcag.....                                                                               |    | 20  | 0   | 20    | 0  | smb    |
| ...uuuguuucgucuccacggcaU.....                                                                               |    | 1   | 1   | 1     | 1  | smb    |
| ...uuuguuucgucuccacggcagU.....                                                                              |    | 3   | 1   | 3     | 1  | smb    |
| ...uuguuucgucuccacggcag.....                                                                                |    | 1   | 0   | 1     | 0  | smb    |
| ...caacgagauuggccuucuu.....                                                                                 |    | 11  | 0   | 11    | 0  | smb    |
| ...caacgagauuAgccuucug.....                                                                                 |    | 1   | 1   | 1     | 1  | smb    |
| ...caacgagauuggccuugG.....                                                                                  |    | 1   | 1   | 1     | 1  | smb    |
| ...caacgagauuggccuucug.....                                                                                 |    | 496 | 0   | 496   | 0  | smb    |
| ...caacgagauuggccuucuu.....                                                                                 |    | 10  | 1   | 10    | 1  | smb    |
| ...caacgagauuggccuucugU.....                                                                                |    | 1   | 1   | 1     | 1  | smb    |
| ...caacUagauuggccuucugU.....                                                                                |    | 1   | 1   | 1     | 1  | smb    |
| ...caacgagauuggcGuucugU.....                                                                                |    | 1   | 1   | 1     | 1  | smb    |
| ...caacgagauuggcUuucugU.....                                                                                |    | 1   | 1   | 1     | 1  | smb    |

Star

Mature

|                                                                                                            |      |   |     |
|------------------------------------------------------------------------------------------------------------|------|---|-----|
| aaagcacaagaaggccaauucguugcugccguggagacggaaacaaaguuguuuucgucuccacggcagcaacgagauuggccuucugucuuuggacauugaaaca |      |   |     |
| .....caacgagauuggccuucCgu.....                                                                             | 1    | 1 | smb |
| .....caacgagauuggccuucUu.....                                                                              | 10   | 1 | smb |
| .....caacgagauuggccuucugu.....                                                                             | 985  | 0 | smb |
| .....caacgagauuggGccuucugu.....                                                                            | 1    | 1 | smb |
| .....caacgaUauuggccuucugu.....                                                                             | 1    | 1 | smb |
| .....caacgagauuggccuucuguU.....                                                                            | 72   | 1 | smb |
| .....caacgagauuggccuucuguA.....                                                                            | 6    | 1 | smb |
| .....caacgagauuggccuucugug.....                                                                            | 134  | 0 | smb |
| .....caatUgagauuggccuucugug.....                                                                           | 1    | 1 | smb |
| .....caacgagauuggccuucugCgc.....                                                                           | 2    | 1 | smb |
| .....caacgagauuggccuucCgugc.....                                                                           | 4    | 1 | smb |
| .....caacgagauugAccuucugugc.....                                                                           | 3    | 1 | smb |
| .....caacgagauuggccuucUaugc.....                                                                           | 1    | 1 | smb |
| .....caacgagauuggccuucuguUc.....                                                                           | 5    | 1 | smb |
| .....caacgagauuggccuucugugG.....                                                                           | 4    | 1 | smb |
| .....caacgagauuggccuucugugA.....                                                                           | 5    | 1 | smb |
| .....caacgagauuggccuuUugugc.....                                                                           | 1    | 1 | smb |
| .....caacgagauuggccuucuguAc.....                                                                           | 3    | 1 | smb |
| .....caacgagauugCccuucugugc.....                                                                           | 2    | 1 | smb |
| .....caaUgagauuggccuucugugc.....                                                                           | 2    | 1 | smb |
| .....caacgagauuCGccuucugugc.....                                                                           | 1    | 1 | smb |
| .....caacgagauuAgccuucugugc.....                                                                           | 1    | 1 | smb |
| .....caacgagauuggccuucugugc.....                                                                           | 3595 | 0 | smb |
| .....caacgaAauuggccuucugugc.....                                                                           | 1    | 1 | smb |
| .....caacgagauuggccuucugugU.....                                                                           | 19   | 1 | smb |
| .....caacgagUuuggccuucugugc.....                                                                           | 1    | 1 | smb |
| .....caacgagauugUccuucugugc.....                                                                           | 2    | 1 | smb |
| .....caacgagauuggccuucugugcu.....                                                                          | 2    | 0 | smb |
| .....caacgagauuggccuucugugcuu.....                                                                         | 1    | 0 | smb |
| .....caacgagauuggccuucugugUuu.....                                                                         | 1    | 1 | smb |
| .....caacgagauuggccuucugugUuuu.....                                                                        | 1    | 1 | smb |
| .....aacgagauuggccuucug.....                                                                               | 1    | 0 | smb |
| .....aacgagauuggccuucugu.....                                                                              | 1    | 0 | smb |
| .....aacgagauuggccuucugugc.....                                                                            | 4    | 0 | smb |
| .....aacgagauuggccuucugugcu.....                                                                           | 5    | 0 | smb |
| .....acgagauuggccuucugu.....                                                                               | 1    | 0 | smb |
| .....acgagauuggccuucugugc.....                                                                             | 2    | 0 | smb |
| .....cgagauuggccuucugugc.....                                                                              | 3    | 0 | smb |
| .....gagauuggccuucugugc.....                                                                               | 1    | 0 | smb |





Mature

Star

|                                                              |                           |                           |     |   |     |
|--------------------------------------------------------------|---------------------------|---------------------------|-----|---|-----|
| uuucauggacuacgggcgugcgggacucgauucggaggugcuugucuugucauggcagua | cagguacugccacgacaacaaaagc | accuccgaaucgagucucugacacc |     |   |     |
| .....ugcuugucuCgucauggcagu.....                              |                           |                           | 51  | 1 | smb |
| .....ugcuugucuCgucauggcagu.....                              |                           |                           | 13  | 1 | smb |
| .....ugcuugucuCgucauggcaguac.....                            |                           |                           | 28  | 1 | smb |
| .....uugucuugucauggcaguac.....                               |                           |                           | 1   | 0 | smb |
| .....uugucGugucauggcaguaca.....                              |                           |                           | 1   | 1 | smb |
| .....uugucuugucauggcaguacagU.....                            |                           |                           | 1   | 1 | smb |
| .....caccuccgaaucgagucucuga....                              |                           |                           | 3   | 0 | smb |
| .....accuccgaaucgagucu.....                                  |                           |                           | 1   | 0 | smb |
| .....accuccgaaucgagucuc.....                                 |                           |                           | 5   | 0 | smb |
| .....accuccgaaucgagucucug....                                |                           |                           | 3   | 0 | smb |
| .....accuccgaaucgagucucuUa....                               |                           |                           | 1   | 1 | smb |
| .....accuccgaaucgagucucugU....                               |                           |                           | 2   | 1 | smb |
| .....accuccgaaucgagucucuga....                               |                           |                           | 618 | 0 | smb |
| .....accuccgaaucgagucucugac....                              |                           |                           | 1   | 0 | smb |
| .....accuccgaaucgagucucugaA....                              |                           |                           | 3   | 1 | smb |
| .....accuccgaaucgagucucugaU....                              |                           |                           | 16  | 1 | smb |
| .....accuccgaaucgagucucugaca....                             |                           |                           | 4   | 0 | smb |
| .....accuccgaaucgagucucugacaA....                            |                           |                           | 1   | 1 | smb |
| .....accuccgaaucgagucucugacaU....                            |                           |                           | 2   | 1 | smb |
| .....cccuccgaaucgagucucugac....                              |                           |                           | 1   | 0 | smb |





Star

Mature

|                                                                       |                                            |    |   |     |
|-----------------------------------------------------------------------|--------------------------------------------|----|---|-----|
| gagcaagugacgacuacauucuauguuucuggggcaauaucuaccgggaaagauauugccccagaaaca | uagaauguagucgucaucuugcuccgaggcgguaccucgguc | 23 | 0 | smb |
| .....                                                                 | .....uagaauguagucgucaucuugcu.....          | 1  | 1 | smb |
| .....                                                                 | .....uagaauguagucgucaucuugcuA.....         | 1  | 1 | smb |
| .....                                                                 | .....uagaauguagucgucaucuU.....             | 1  | 1 | smb |
| .....                                                                 | .....agaauguagucgucaucu.....               | 2  | 0 | smb |
| .....                                                                 | .....agaauguagucgucaucuugc.....            | 10 | 0 | smb |
| .....                                                                 | .....agGauguagucgucaucuugcu.....           | 1  | 1 | smb |
| .....                                                                 | .....agaauguagucgucaucuugcu.....           | 37 | 0 | smb |
| .....                                                                 | .....gaauguagucgucaucuugcu.....            | 1  | 0 | smb |
| .....                                                                 | .....aauguagucgucaucuugcucc.....           | 2  | 0 | smb |

Provisional ID : 3822019\_126068\_4805016\_3717763-...,3729016+\_18282  
 Score total : 179.9  
 Score for star read(s) : 3.9  
 Score for read counts : 171.9  
 Score for mfe : 3.1  
 Score for randfold : 1.6  
 Score for cons. seed : -0.6  
 Total read count : 349  
 Mature read count : 231  
 Loop read count : 2  
 Star read count : 116

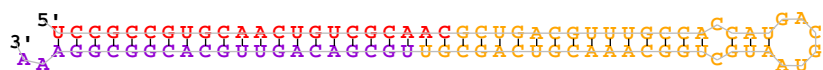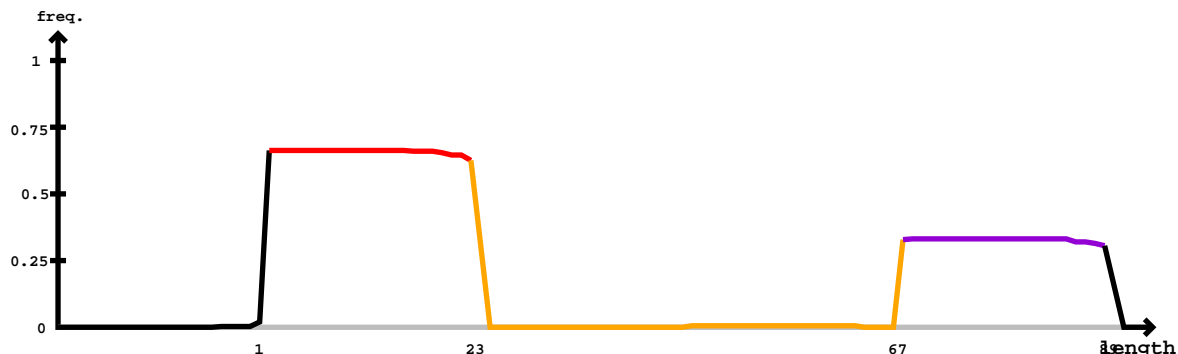

**Mature**

**Star**

| 5' - uccaaaucugcaucaagcuuuccg <sup>c</sup> cgug <sup>ca</sup> acug <sup>uc</sup> g <sup>ca</sup> acg <sup>cg</sup> uc <sup>ag</sup> cg <sup>uu</sup> ug <sup>cc</sup> accaug <sup>ac</sup> g <sup>u</sup> aaug <sup>cg</sup> g <sup>ca</sup> aacg <sup>uc</sup> ag <sup>cg</sup> u <sup>u</sup> g <sup>ca</sup> cagu <sup>gc</sup> acg <sup>gg</sup> cggaaccu -3' | obs   | mm | sample |
|-------------------------------------------------------------------------------------------------------------------------------------------------------------------------------------------------------------------------------------------------------------------------------------------------------------------------------------------------------------------|-------|----|--------|
| uccaaaucugcaucaagcuuuccg <sup>c</sup> cgug <sup>ca</sup> acug <sup>uc</sup> g <sup>ca</sup> acg <sup>cg</sup> uc <sup>ag</sup> cg <sup>uu</sup> ug <sup>cc</sup> accaug <sup>ac</sup> g <sup>u</sup> aaug <sup>cg</sup> g <sup>ca</sup> aacg <sup>uc</sup> ag <sup>cg</sup> u <sup>u</sup> g <sup>ca</sup> cagu <sup>gc</sup> acg <sup>gg</sup> cggaaccu          | exp   |    |        |
| .....(((((((((((((((((((((((((((((((((((((((.....)))))))))))))))))))))))))))))))))))).....                                                                                                                                                                                                                                                                        | reads | mm | sample |
| ..... agcuuuccg <sup>c</sup> cgug <sup>ca</sup> acug <sup>uc</sup> g <sup>ca</sup> acg <sup>cg</sup> uc <sup>ag</sup> cg <sup>uu</sup> ug <sup>cc</sup> accaug <sup>ac</sup> g <sup>u</sup> aaug <sup>cg</sup> g <sup>ca</sup> aacg <sup>uc</sup> ag <sup>cg</sup> u <sup>u</sup> g <sup>ca</sup> cagu <sup>gc</sup> acg <sup>gg</sup> cggaaccu .....             | 1     | 1  | smb    |
| ..... uuccg <sup>c</sup> cgug <sup>ca</sup> acug <sup>uc</sup> g <sup>ca</sup> acg <sup>cg</sup> uc <sup>ag</sup> cg <sup>uu</sup> ug <sup>cc</sup> accaug <sup>ac</sup> g <sup>u</sup> aaug <sup>cg</sup> g <sup>ca</sup> aacg <sup>uc</sup> ag <sup>cg</sup> u <sup>u</sup> g <sup>ca</sup> cagu <sup>gc</sup> acg <sup>gg</sup> cggaaccu .....                 | 1     | 0  | smb    |
| ..... uuccg <sup>c</sup> cgug <sup>ca</sup> acug <sup>uc</sup> g <sup>ca</sup> acg <sup>cg</sup> uc <sup>ag</sup> cg <sup>uu</sup> ug <sup>cc</sup> accaug <sup>ac</sup> g <sup>u</sup> aaug <sup>cg</sup> g <sup>ca</sup> aacg <sup>uc</sup> ag <sup>cg</sup> u <sup>u</sup> g <sup>ca</sup> cagu <sup>gc</sup> acg <sup>gg</sup> cggaaccu .....                 | 4     | 0  | smb    |
| ..... uuccg <sup>c</sup> cgug <sup>ca</sup> acug <sup>uc</sup> g <sup>ca</sup> acg <sup>cg</sup> uc <sup>ag</sup> cg <sup>uu</sup> ug <sup>cc</sup> accaug <sup>ac</sup> g <sup>u</sup> aaug <sup>cg</sup> g <sup>ca</sup> aacg <sup>uc</sup> ag <sup>cg</sup> u <sup>u</sup> g <sup>ca</sup> cagu <sup>gc</sup> acg <sup>gg</sup> cggaaccu .....                 | 1     | 1  | smb    |
| ..... uccg <sup>c</sup> cgug <sup>ca</sup> acug <sup>uc</sup> g <sup>ca</sup> acg <sup>cg</sup> uc <sup>ag</sup> cg <sup>uu</sup> ug <sup>cc</sup> accaug <sup>ac</sup> g <sup>u</sup> aaug <sup>cg</sup> g <sup>ca</sup> aacg <sup>uc</sup> ag <sup>cg</sup> u <sup>u</sup> g <sup>ca</sup> cagu <sup>gc</sup> acg <sup>gg</sup> cggaaccu .....                  | 1     | 0  | smb    |
| ..... uccg <sup>c</sup> cgug <sup>ca</sup> acug <sup>uc</sup> g <sup>ca</sup> acg <sup>cg</sup> uc <sup>ag</sup> cg <sup>uu</sup> ug <sup>cc</sup> accaug <sup>ac</sup> g <sup>u</sup> aaug <sup>cg</sup> g <sup>ca</sup> aacg <sup>uc</sup> ag <sup>cg</sup> u <sup>u</sup> g <sup>ca</sup> cagu <sup>gc</sup> acg <sup>gg</sup> cggaaccu .....                  | 3     | 0  | smb    |
| ..... uccg <sup>c</sup> cgug <sup>ca</sup> acug <sup>uc</sup> g <sup>ca</sup> acg <sup>cg</sup> uc <sup>ag</sup> cg <sup>uu</sup> ug <sup>cc</sup> accaug <sup>ac</sup> g <sup>u</sup> aaug <sup>cg</sup> g <sup>ca</sup> aacg <sup>uc</sup> ag <sup>cg</sup> u <sup>u</sup> g <sup>ca</sup> cagu <sup>gc</sup> acg <sup>gg</sup> cggaaccu .....                  | 3     | 0  | smb    |
| ..... uccg <sup>c</sup> cgug <sup>ca</sup> acug <sup>uc</sup> g <sup>ca</sup> acg <sup>cg</sup> uc <sup>ag</sup> cg <sup>uu</sup> ug <sup>cc</sup> accaug <sup>ac</sup> g <sup>u</sup> aaug <sup>cg</sup> g <sup>ca</sup> aacg <sup>uc</sup> ag <sup>cg</sup> u <sup>u</sup> g <sup>ca</sup> cagu <sup>gc</sup> acg <sup>gg</sup> cggaaccu .....                  | 200   | 0  | smb    |
| ..... uccA <sup>c</sup> cgug <sup>ca</sup> acug <sup>uc</sup> g <sup>ca</sup> acg <sup>cg</sup> uc <sup>ag</sup> cg <sup>uu</sup> ug <sup>cc</sup> accaug <sup>ac</sup> g <sup>u</sup> aaug <sup>cg</sup> g <sup>ca</sup> aacg <sup>uc</sup> ag <sup>cg</sup> u <sup>u</sup> g <sup>ca</sup> cagu <sup>gc</sup> acg <sup>gg</sup> cggaaccu .....                  | 1     | 1  | smb    |
| ..... uccg <sup>c</sup> cgug <sup>ca</sup> acug <sup>uc</sup> g <sup>ca</sup> acg <sup>cg</sup> uc <sup>ag</sup> cg <sup>uu</sup> ug <sup>cc</sup> accaug <sup>ac</sup> g <sup>u</sup> aaug <sup>cg</sup> g <sup>ca</sup> aacg <sup>uc</sup> ag <sup>cg</sup> u <sup>u</sup> g <sup>ca</sup> cagu <sup>gc</sup> acg <sup>gg</sup> cggaaccu .....                  | 1     | 1  | smb    |
| ..... uccgA <sup>c</sup> gug <sup>ca</sup> acug <sup>uc</sup> g <sup>ca</sup> acg <sup>cg</sup> uc <sup>ag</sup> cg <sup>uu</sup> ug <sup>cc</sup> accaug <sup>ac</sup> g <sup>u</sup> aaug <sup>cg</sup> g <sup>ca</sup> aacg <sup>uc</sup> ag <sup>cg</sup> u <sup>u</sup> g <sup>ca</sup> cagu <sup>gc</sup> acg <sup>gg</sup> cggaaccu .....                  | 1     | 1  | smb    |
| ..... uccg <sup>c</sup> cgug <sup>ca</sup> acug <sup>uc</sup> g <sup>ca</sup> acg <sup>cg</sup> uc <sup>ag</sup> cg <sup>uu</sup> ug <sup>cc</sup> accaug <sup>ac</sup> g <sup>u</sup> aaug <sup>cg</sup> g <sup>ca</sup> aacg <sup>uc</sup> ag <sup>cg</sup> u <sup>u</sup> g <sup>ca</sup> cagu <sup>gc</sup> acg <sup>gg</sup> cggaaccu .....                  | 15    | 1  | smb    |
| ..... .uaaug <sup>c</sup> ug <sup>g</sup> caaacg <sup>uca</sup> .....                                                                                                                                                                                                                                                                                             | 2     | 0  | smb    |
| ..... .ug <sup>ca</sup> cagu <sup>gc</sup> acg <sup>gg</sup> cg <sup>ga</sup> .....                                                                                                                                                                                                                                                                               | 4     | 0  | smb    |
| ..... .ug <sup>ca</sup> cagu <sup>gc</sup> acg <sup>gg</sup> cg <sup>ga</sup> .....                                                                                                                                                                                                                                                                               | 2     | 0  | smb    |
| ..... .ug <sup>ca</sup> cagu <sup>gc</sup> acg <sup>gg</sup> cg <sup>ga</sup> .....                                                                                                                                                                                                                                                                               | 2     | 0  | smb    |
| ..... .ug <sup>ca</sup> cagu <sup>gc</sup> acg <sup>gg</sup> cg <sup>ga</sup> U.....                                                                                                                                                                                                                                                                              | 1     | 1  | smb    |
| ..... .ug <sup>ca</sup> cagu <sup>gc</sup> acg <sup>gg</sup> cg <sup>ga</sup> .....                                                                                                                                                                                                                                                                               | 104   | 0  | smb    |
| ..... .ug <sup>ca</sup> cagu <sup>gc</sup> acg <sup>gg</sup> cg <sup>ga</sup> A.....                                                                                                                                                                                                                                                                              | 2     | 1  | smb    |
| ..... .g <sup>ca</sup> cagu <sup>gc</sup> acg <sup>gg</sup> cg <sup>ga</sup> aac.....                                                                                                                                                                                                                                                                             | 1     | 0  | smb    |

Provisional ID : 3816686\_121257\_3582422\_1491058+,,3738891-\_11659  
 Score total : 686.4  
 Score for star read(s) : 3.9  
 Score for read counts : 678.7  
 Score for mfe : 2.8  
 Score for randfold : 1.6  
 Score for cons. seed : -0.6  
 Total read count : 1343  
 Mature read count : 956  
 Loop read count : 365  
 Star read count : 22

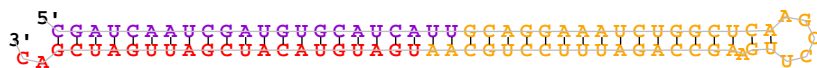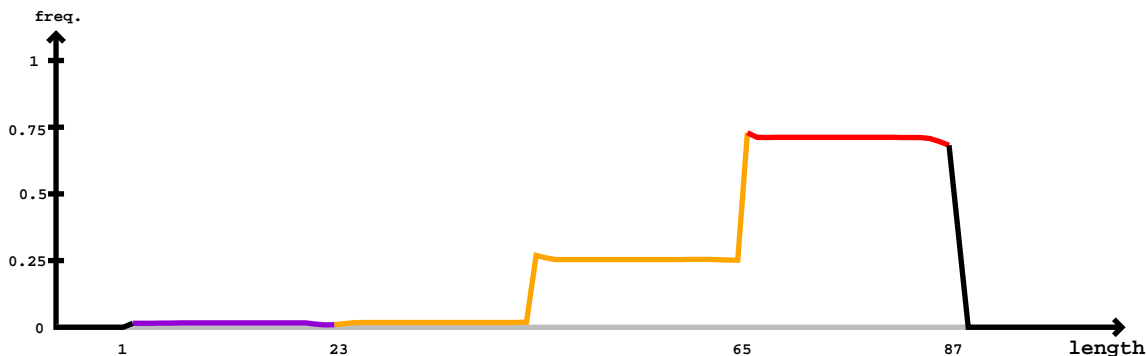

Star

Mature

| 5' -                                                                                                                                                                              | obs | reads | mm  | sample |
|-----------------------------------------------------------------------------------------------------------------------------------------------------------------------------------|-----|-------|-----|--------|
| aucagucg <u>ga</u> ucaaucgaugugcaucauu <u>gc</u> agga <u>aa</u> ucuggcucaagccuugaagccagauuuccugca <u>aa</u> ugaugu <u>ac</u> aucga <u>uu</u> gaucgac <u>cg</u> uuugaugacugguu -3' | exp |       |     |        |
| .....cgauc <u>aa</u> ucgaugugcauc.....                                                                                                                                            | 6   | 0     | smb |        |
| .....cgauc <u>aa</u> ucgaugugcauca.....                                                                                                                                           | 4   | 0     | smb |        |
| .....cgauc <u>aa</u> ucgaugugcaucau.....                                                                                                                                          | 2   | 0     | smb |        |
| .....cgauc <u>aa</u> ucgaugugcaucauu.....                                                                                                                                         | 8   | 0     | smb |        |
| .....ucaucgaugugcaucau.....                                                                                                                                                       | 1   | 0     | smb |        |
| .....aaucgaugugcaucauu.....                                                                                                                                                       | 1   | 1     | smb |        |
| .....ugcagga <u>aa</u> ucuggcucaagU.....                                                                                                                                          | 1   | 1     | smb |        |
| .....ugcagga <u>aa</u> ucuggcucaagcc.....                                                                                                                                         | 2   | 0     | smb |        |
| .....ugcagga <u>aa</u> ucuggcucaagcU.....                                                                                                                                         | 1   | 1     | smb |        |
| .....gcagga <u>aa</u> ucuggcucaagc.....                                                                                                                                           | 2   | 0     | smb |        |
| .....gcagga <u>aa</u> ucuggcucaagcc.....                                                                                                                                          | 5   | 0     | smb |        |
| .....gcagga <u>aa</u> ucuggcucaagcU.....                                                                                                                                          | 4   | 1     | smb |        |
| .....gcagga <u>aa</u> ucuggcucaagccu.....                                                                                                                                         | 6   | 0     | smb |        |
| .....gcagga <u>aa</u> ucuggcucaagcUu.....                                                                                                                                         | 2   | 1     | smb |        |
| .....agg <u>aa</u> ucuggcucaagccu.....                                                                                                                                            | 1   | 0     | smb |        |
| .....ccuugaagccagauuuccugcaa.....                                                                                                                                                 | 2   | 0     | smb |        |
| .....cuugaagccagauuuccug.....                                                                                                                                                     | 2   | 0     | smb |        |
| .....cuugaagccagauuuccugc.....                                                                                                                                                    | 1   | 0     | smb |        |
| .....cuugaagccagauuuccugca.....                                                                                                                                                   | 1   | 0     | smb |        |
| .....cuugaagccCgauuuccugcaa.....                                                                                                                                                  | 1   | 1     | smb |        |
| .....cuugaaUccagauuuccugcaa.....                                                                                                                                                  | 1   | 1     | smb |        |
| .....Guugaagccagauuuccugcaa.....                                                                                                                                                  | 1   | 1     | smb |        |
| .....cuugaagccagauuuccugcaa.....                                                                                                                                                  | 300 | 0     | smb |        |
| .....cuugaagccagauuuccugUaa.....                                                                                                                                                  | 1   | 1     | smb |        |
| .....cuugaagccagauuuccugcaC.....                                                                                                                                                  | 1   | 1     | smb |        |
| .....cuugaGgccagauuuccugcaa.....                                                                                                                                                  | 1   | 1     | smb |        |
| .....cuugaagcAagauuuccugcaa.....                                                                                                                                                  | 1   | 1     | smb |        |
| .....cuugaagccagauuuccugcaau.....                                                                                                                                                 | 23  | 0     | smb |        |
| .....cuugaagccagauuuccugcaaA.....                                                                                                                                                 | 2   | 1     | smb |        |
| .....Uuugaagccagauuuccugcaau.....                                                                                                                                                 | 1   | 1     | smb |        |
| .....cuugaagccagauuUGcugcaau.....                                                                                                                                                 | 1   | 1     | smb |        |
| .....cuugaagccagauuuccugcaauU.....                                                                                                                                                | 1   | 1     | smb |        |
| .....cugcaaugauguacaucgaug.....                                                                                                                                                   | 1   | 0     | smb |        |

Star

Mature

|                                                                        |                         |       |       |       |
|------------------------------------------------------------------------|-------------------------|-------|-------|-------|
| aucagucgaucaaucgaugugcaucauugcaggaauucuggcucaagccuugaagccagauuuccugcaa | ugauguacaucgauugauc     | 5     | 0     | smb   |
| .....                                                                  | .....                   | ..... | ..... | ..... |
| .....                                                                  | ugauguacaucgauugaucg    | 15    | 0     | smb   |
| .....                                                                  | ugauguacaucgauugaucgU   | 4     | 1     | smb   |
| .....                                                                  | ugauguacaucgauugaucga   | 15    | 0     | smb   |
| .....                                                                  | ugauguacaucgauugaucgaU  | 49    | 1     | smb   |
| .....                                                                  | ugaugAuacaucgauugaucgac | 1     | 1     | smb   |
| .....                                                                  | ugauguacGucgauugaucgac  | 1     | 1     | smb   |
| .....                                                                  | ugauguacCucgauugaucgac  | 1     | 1     | smb   |
| .....                                                                  | ugauguacaucgauugaucgac  | 611   | 0     | smb   |
| .....                                                                  | ugauguacaucgUugaucgac   | 1     | 1     | smb   |
| .....                                                                  | ugauguCcaucgauugaucgac  | 1     | 1     | smb   |
| .....                                                                  | Cgauguacaucgauugaucgac  | 1     | 1     | smb   |
| .....                                                                  | ugauguacaucgauugaucgacU | 242   | 1     | smb   |
| .....                                                                  | ugauguacaucgauugaucgacc | 2     | 0     | smb   |
| .....                                                                  | ugauguacaucgauugaucgacA | 1     | 1     | smb   |
| .....                                                                  | ugauguacaucgauugaucgacG | 1     | 1     | smb   |
| .....                                                                  | gauguacaucgauugaucgacc  | 4     | 0     | smb   |
| .....                                                                  | uguacaucgauugaucgacc    | 1     | 0     | smb   |





Mature

Star

|                                                                                                                    |     |   |     |
|--------------------------------------------------------------------------------------------------------------------|-----|---|-----|
| gaaaacgaugcggccucgggugccaacgugauuugcaaacuccgacugcgucacccaggaugugagccccucugugacgcagucggaguuugcaaaucacguuggcagcgcgag |     |   |     |
| .....gccccucugugacgcagucgC.....                                                                                    | 1   | 1 | smb |
| .....gccccucugugacgcagucGU.....                                                                                    | 4   | 1 | smb |
| .....gccccucugugacgcagucgg.....                                                                                    | 7   | 0 | smb |
| .....gccccucugugacgcagucgga.....                                                                                   | 166 | 0 | smb |
| .....gccccucugugacgcagucggG.....                                                                                   | 2   | 1 | smb |
| .....gccccucUugacgcagucgga.....                                                                                    | 2   | 1 | smb |
| .....gccccucugugacgcagucggU.....                                                                                   | 1   | 1 | smb |
| .....gccccucugugacgcagucggaU.....                                                                                  | 1   | 1 | smb |
| .....ccccucugugacgcagU.....                                                                                        | 1   | 1 | smb |
| .....ccccucugugacgcagucgga.....                                                                                    | 1   | 0 | smb |
| .....ccccucugugacgcagucggag.....                                                                                   | 20  | 0 | smb |
| .....ccccucugugacCagucggag.....                                                                                    | 1   | 1 | smb |
| .....gugacgcagucggaguuugcaaaucacg.....                                                                             | 1   | 0 | smb |
| .....gaguugcaaaucacguuggcU.....                                                                                    | 1   | 1 | smb |
| .....aguugcaaaucacguuggc.....                                                                                      | 3   | 0 | smb |
| .....aguugcaaaucacguuggcU.....                                                                                     | 1   | 1 | smb |
| .....aguugcaaaucacguuggca.....                                                                                     | 1   | 0 | smb |
| .....aguugcaaaucacguuggcag.....                                                                                    | 1   | 0 | smb |
| .....aguugcaaaucacguuggcagC.....                                                                                   | 47  | 0 | smb |
| .....aguugcaaaucacgAuggcagc.....                                                                                   | 1   | 1 | smb |
| .....guugcaaaucacguuggcU.....                                                                                      | 2   | 1 | smb |
| .....guugcaaaucacguuggca.....                                                                                      | 4   | 0 | smb |
| .....guugcaaaucacguuggcag.....                                                                                     | 4   | 0 | smb |
| .....guugcaaaucacguuggcaU.....                                                                                     | 1   | 1 | smb |
| .....guugcaaaucacguuggcagC.....                                                                                    | 1   | 0 | smb |
| .....guugcaaaucacguuggcagcg.....                                                                                   | 1   | 0 | smb |
| .....uugcaaaucacguuggca.....                                                                                       | 5   | 0 | smb |
| .....uugcaaaucacguuggcag.....                                                                                      | 3   | 0 | smb |
| .....uugcaaaucacguuggcaU.....                                                                                      | 1   | 1 | smb |
| .....uugcaaaucacguuggcagU.....                                                                                     | 2   | 1 | smb |
| .....uugcaaaucacguuggcagC.....                                                                                     | 41  | 0 | smb |
| .....uugcaaaucacguuggcagcU.....                                                                                    | 2   | 1 | smb |
| .....uugcaaaucacguuggcagcg.....                                                                                    | 11  | 0 | smb |
| .....uugcaaaucacguuggcagcgc.....                                                                                   | 8   | 0 | smb |
| .....uugcaaaucacguuggcagcgcg.....                                                                                  | 1   | 0 | smb |

Provisional ID : 3820014\_173156\_5996552\_3688891+,,,,,3767802-\_15417  
 Score total : 2373  
 Score for star read(s) : 3.9  
 Score for read counts : 2364.7  
 Score for mfe : 3.4  
 Score for randfold : 1.6  
 Score for cons. seed : -0.6  
 Total read count : 4650  
 Mature read count : 2562  
 Loop read count : 2086  
 Star read count : 2

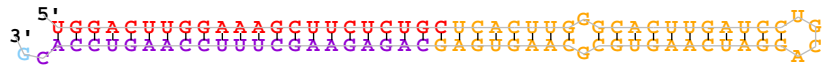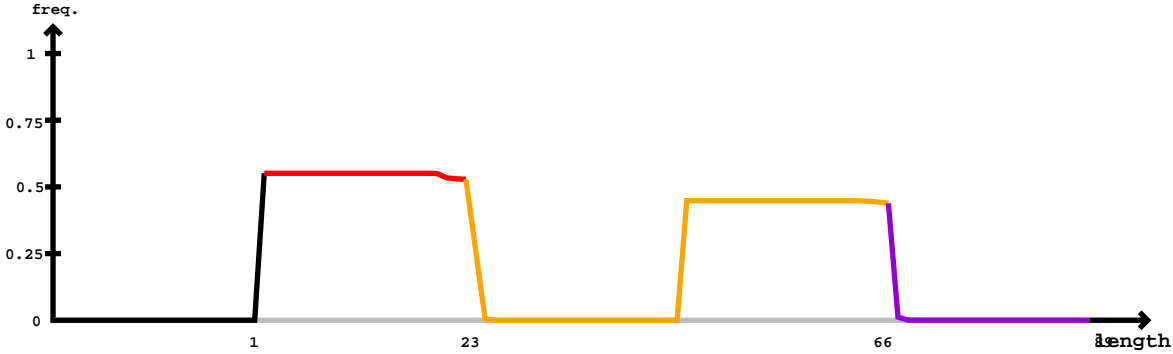

**Mature**

**Star**

| 5'                   |                                                            |               | -3'                  | obs                | exp            | reads | mm | sample |
|----------------------|------------------------------------------------------------|---------------|----------------------|--------------------|----------------|-------|----|--------|
| ggguugcagaugcgcgucug | <span style="color:red">uggacuuggaaaagcuucucugcucac</span> | uugggcaacuuga | uccugcaggaucaagugcgc | aagugagcagagaagcuu | ccaaguccaggagc | 4     | 0  | smb    |
| ggguugcagaugcgcgucug | <span style="color:red">uggacuuggaaaagcuucucugcucac</span> | uugggcaacuuga | uccugcaggaucaagugcgc | aagugagcagagaagcuu | ccaaguccaggagc | 75    | 0  | smb    |
| .....)               | (((                                                        | (((           | (((                  | (((                | (((            | 1     | 1  | smb    |
| .....)               | (((                                                        | (((           | (((                  | (((                | (((            | 1     | 1  | smb    |
| .....)               | (((                                                        | (((           | (((                  | (((                | (((            | 1     | 1  | smb    |
| .....)               | (((                                                        | (((           | (((                  | (((                | (((            | 13    | 0  | smb    |
| .....)               | (((                                                        | (((           | (((                  | (((                | (((            | 1     | 1  | smb    |
| .....)               | (((                                                        | (((           | (((                  | (((                | (((            | 10    | 0  | smb    |
| .....)               | (((                                                        | (((           | (((                  | (((                | (((            | 1     | 1  | smb    |
| .....)               | (((                                                        | (((           | (((                  | (((                | (((            | 1     | 1  | smb    |
| .....)               | (((                                                        | (((           | (((                  | (((                | (((            | 1     | 1  | smb    |
| .....)               | (((                                                        | (((           | (((                  | (((                | (((            | 8     | 1  | smb    |
| .....)               | (((                                                        | (((           | (((                  | (((                | (((            | 2352  | 0  | smb    |
| .....)               | (((                                                        | (((           | (((                  | (((                | (((            | 1     | 1  | smb    |
| .....)               | (((                                                        | (((           | (((                  | (((                | (((            | 4     | 1  | smb    |
| .....)               | (((                                                        | (((           | (((                  | (((                | (((            | 1     | 1  | smb    |
| .....)               | (((                                                        | (((           | (((                  | (((                | (((            | 2     | 1  | smb    |
| .....)               | (((                                                        | (((           | (((                  | (((                | (((            | 1     | 1  | smb    |
| .....)               | (((                                                        | (((           | (((                  | (((                | (((            | 1     | 1  | smb    |
| .....)               | (((                                                        | (((           | (((                  | (((                | (((            | 5     | 1  | smb    |
| .....)               | (((                                                        | (((           | (((                  | (((                | (((            | 1     | 1  | smb    |
| .....)               | (((                                                        | (((           | (((                  | (((                | (((            | 51    | 0  | smb    |
| .....)               | (((                                                        | (((           | (((                  | (((                | (((            | 2     | 1  | smb    |
| .....)               | (((                                                        | (((           | (((                  | (((                | (((            | 24    | 1  | smb    |
| .....)               | (((                                                        | (((           | (((                  | (((                | (((            | 3     | 0  | smb    |
| .....)               | (((                                                        | (((           | (((                  | (((                | (((            | 4     | 0  | smb    |
| .....)               | (((                                                        | (((           | (((                  | (((                | (((            | 1     | 1  | smb    |
| .....)               | (((                                                        | (((           | (((                  | (((                | (((            | 6     | 0  | smb    |
| .....)               | (((                                                        | (((           | (((                  | (((                | (((            | 2     | 1  | smb    |
| .....)               | (((                                                        | (((           | (((                  | (((                | (((            | 13    | 0  | smb    |
| .....)               | (((                                                        | (((           | (((                  | (((                | (((            | 20    | 0  | smb    |
| .....)               | (((                                                        | (((           | (((                  | (((                | (((            | 3     | 1  | smb    |
| .....)               | (((                                                        | (((           | (((                  | (((                | (((            | 1     | 1  | smb    |

Mature

Star

|                                                                                                                      |      |   |     |
|----------------------------------------------------------------------------------------------------------------------|------|---|-----|
| ggguugcagaugccgcuccguggacuuggaaagcuucucugcucacuuugggcaacuugaucuccugcaggaucaagugcgcaagugagcagagaagcuuuccaaguccaeggagc |      |   |     |
| .....aggaucaagugcgctUagugagc.....                                                                                    | 1    | 1 | smb |
| .....aggaucaagugcgcaagugagc.....                                                                                     | 1960 | 0 | smb |
| .....Gggaucaagugcgcaagugagc.....                                                                                     | 1    | 1 | smb |
| .....aCgaucaagugcgcaagugagc.....                                                                                     | 1    | 1 | smb |
| .....aggaucaagCgcgcaagugagc.....                                                                                     | 1    | 1 | smb |
| .....aggaucaagUGcaagugagc.....                                                                                       | 2    | 1 | smb |
| .....aggaucaUgugcgcaagugagc.....                                                                                     | 1    | 1 | smb |
| .....aggaucaagugcgcaagugagU.....                                                                                     | 4    | 1 | smb |
| .....aggaucaagAgcgcaagugagc.....                                                                                     | 2    | 1 | smb |
| .....aggaucaagugcAcaagugagc.....                                                                                     | 2    | 1 | smb |
| .....aggaucaagugcgcaaguAagc.....                                                                                     | 1    | 1 | smb |
| .....aggaucaagugcgcaagugagG.....                                                                                     | 1    | 1 | smb |
| .....Uggaucaagugcgcaagugagc.....                                                                                     | 1    | 1 | smb |
| .....aggaucaagugcgcaagugagcC.....                                                                                    | 2    | 1 | smb |
| .....aggaucaagugcgcaagugagcU.....                                                                                    | 49   | 1 | smb |
| .....aggaucaagugcgcaagugagcUg.....                                                                                   | 1    | 1 | smb |
| .....aggaucaagugcgcaagugagcaU.....                                                                                   | 1    | 1 | smb |
| .....ggaucaagugcgcaagugagc.....                                                                                      | 1    | 0 | smb |
| .....cagagaagcuuuccaaguccac.....                                                                                     | 1    | 0 | smb |
| .....agagaagcuuuccaagucca.....                                                                                       | 1    | 0 | smb |

Provisional ID : 3822730\_183324\_5706849\_3728833+,,...,3718809-\_19405  
 Score total : 295.3  
 Score for star read(s) : 3.9  
 Score for read counts : 287.2  
 Score for mfe : 3.2  
 Score for randfold : 1.6  
 Score for cons. seed : -0.6  
 Total read count : 575  
 Mature read count : 328  
 Loop read count : 228  
 Star read count : 19

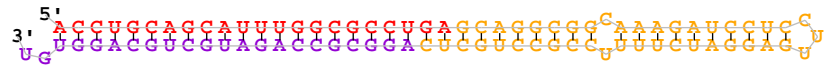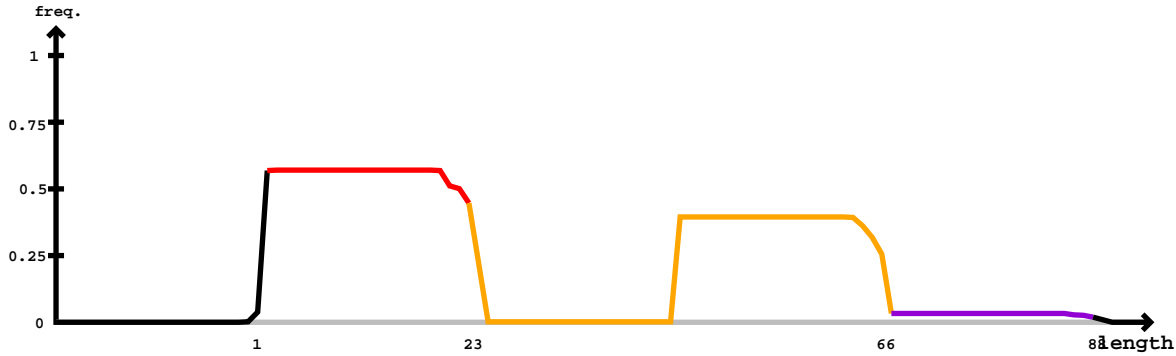

**Mature**

**Star**

| 5' -                                                                                                                    | reads | mm | sample |
|-------------------------------------------------------------------------------------------------------------------------|-------|----|--------|
| caucauugacaacaugcuccaccugcagcauuuggcgccugagcaggcgcaagaauccuccuugaggauuuuuccgucugcagggccagaucugcagguguggauu              |       |    |        |
| caucauugacaacaugcuccaccugcagcauuuggcgccugagcaggcgcaagaauccuccuugaggauuuuuccgucugcagggccagaucugcagguguggauu              |       |    |        |
| .....((((((((((((((((((((((((((((((((((((((((((((((((((((((((((((((((((((((((((((((((((((((((((((((((((((((((.....))))) |       |    |        |
| .....cAaccugcagcauuuggcgccuga.....                                                                                      | 1     | 1  | smb    |
| .....caccugcagcauuuggcgcc.....                                                                                          | 1     | 0  | smb    |
| .....caccugcagcauuuggcgccu.....                                                                                         | 2     | 0  | smb    |
| .....caccugcagcauuuggcgccug.....                                                                                        | 18    | 0  | smb    |
| .....accugcagcauuuggcgcc.....                                                                                           | 1     | 0  | smb    |
| .....accugcagcauuuggcgcc.....                                                                                           | 32    | 0  | smb    |
| .....accugcagcauuuggcgccu.....                                                                                          | 4     | 0  | smb    |
| .....accugcagcauuuggcgccGg.....                                                                                         | 2     | 1  | smb    |
| .....accugcagcauuuggcgccug.....                                                                                         | 11    | 0  | smb    |
| .....accugcagcauuuggcgccuga.....                                                                                        | 1     | 1  | smb    |
| .....accugcagcauuuggcgccugU.....                                                                                        | 2     | 1  | smb    |
| .....accugcagcauuuggcgccuga.....                                                                                        | 251   | 0  | smb    |
| .....AccugcagcauuuggcgUcuga.....                                                                                        | 1     | 1  | smb    |
| .....Acugcagcauuuggcgccuga.....                                                                                         | 1     | 1  | smb    |
| .....gcaggcgcaagaauccuccu.....                                                                                          | 1     | 0  | smb    |
| .....ugaggauuuuuccgccu.....                                                                                             | 1     | 0  | smb    |
| .....ugaggauuuuuccgccug.....                                                                                            | 18    | 0  | smb    |
| .....ugaggauuuuuccgccugU.....                                                                                           | 3     | 1  | smb    |
| .....ugaggauuuuuccgccugc.....                                                                                           | 22    | 0  | smb    |
| .....ugaggauuuuuccgccugcu.....                                                                                          | 35    | 0  | smb    |
| .....ugaggauuuuuccgccugcu.....                                                                                          | 1     | 1  | smb    |
| .....ugaggauuuuuccgccugcuc.....                                                                                         | 1     | 1  | smb    |
| .....ugaggauuuuuccgccugcC.....                                                                                          | 1     | 1  | smb    |
| .....ugaggauuuuuccgccugcuc.....                                                                                         | 144   | 0  | smb    |
| .....aggcgccagaucugcagg.....                                                                                            | 3     | 0  | smb    |
| .....aggcgccagaucugcagg.....                                                                                            | 1     | 0  | smb    |
| .....aggcgccagaucugcaggug.....                                                                                          | 4     | 0  | smb    |
| .....aggcgccagaucugcaggugu.....                                                                                         | 9     | 0  | smb    |
| .....aggcgccagaucugcagguguA.....                                                                                        | 2     | 1  | smb    |

Provisional ID : 3751232\_4773\_84610\_4186\_145921\_100637\_404\_521785\_129649\_7726  
 Score total : 623.1  
 Score for star read(s) : 3.9  
 Score for read counts : 615  
 Score for mfe : 3.2  
 Score for randfold : 1.6  
 Score for cons. seed : -0.6  
 Total read count : 1218  
 Mature read count : 970  
 Loop read count : 198  
 Star read count : 50

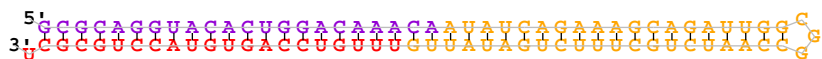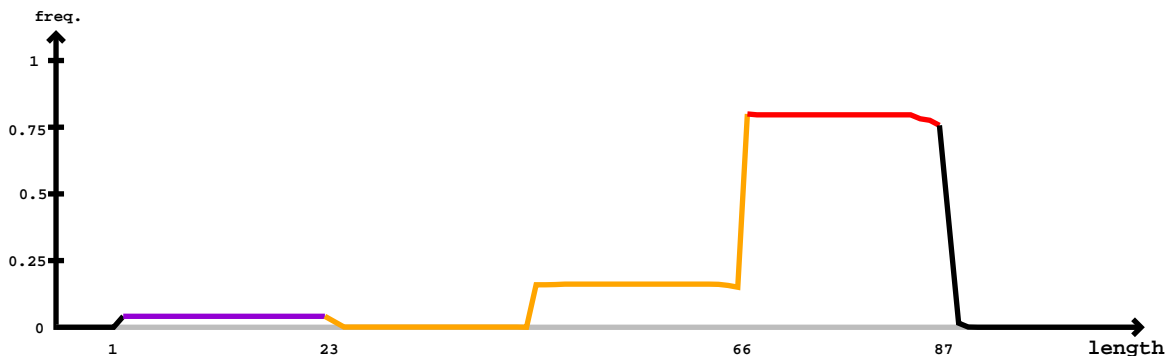

**Star**

**Mature**

| 5'     |                                    | -3'                    | obs | exp | reads | mm | sample |
|--------|------------------------------------|------------------------|-----|-----|-------|----|--------|
| auccag | <b>gcgcagguacacuggacaaaaca</b>     | uuuuguccaguguaccugcgcu | 49  | 0   | smb   |    |        |
| .....  | <b>gcgcagguacacuggacaaaaca</b>     | .....                  | 1   | 1   | smb   |    |        |
| .....  | <b>gcgcagguacacuggacaaaacaU</b>    | .....                  | 1   | 0   | smb   |    |        |
| .....  | <b>.....auaucagaaagcagauuggc</b>   | .....                  | 1   | 0   | smb   |    |        |
| .....  | <b>.....gccaaucugcuuucugaua</b>    | .....                  | 1   | 0   | smb   |    |        |
| .....  | <b>.....gccaaucugcuuucugauau</b>   | .....                  | 5   | 0   | smb   |    |        |
| .....  | <b>.....gccaaucugcuuucugauauu</b>  | .....                  | 9   | 0   | smb   |    |        |
| .....  | <b>.....gccaaucugcuuucugauuu</b>   | .....                  | 174 | 0   | smb   |    |        |
| .....  | <b>.....gccaaucugcuuucugauuuU</b>  | .....                  | 1   | 1   | smb   |    |        |
| .....  | <b>.....gccaaucugcuuucugauuuu</b>  | .....                  | 4   | 0   | smb   |    |        |
| .....  | <b>.....caaucugcuuucugauuu</b>     | .....                  | 1   | 0   | smb   |    |        |
| .....  | <b>.....aaucugcuuucugauuu</b>      | .....                  | 2   | 0   | smb   |    |        |
| .....  | <b>.....guuuguccaguguaccugcgcu</b> | .....                  | 1   | 0   | smb   |    |        |
| .....  | <b>.....uuuguccaguguaccugU</b>     | .....                  | 8   | 1   | smb   |    |        |
| .....  | <b>.....uuuguccaguguaccugc</b>     | .....                  | 10  | 0   | smb   |    |        |
| .....  | <b>.....uuuguccaguguaccugcg</b>    | .....                  | 2   | 0   | smb   |    |        |
| .....  | <b>.....uuuguccaguguaccugcU</b>    | .....                  | 4   | 1   | smb   |    |        |
| .....  | <b>.....uuuguccaguguaccugcC</b>    | .....                  | 1   | 1   | smb   |    |        |
| .....  | <b>.....uuuguccaguguaccugcgC</b>   | .....                  | 22  | 0   | smb   |    |        |
| .....  | <b>.....uuuguccaguguaccugcgU</b>   | .....                  | 1   | 1   | smb   |    |        |
| .....  | <b>.....uuuguccaguguaccugcgC</b>   | .....                  | 1   | 1   | smb   |    |        |
| .....  | <b>.....uuuguccaguguaccuCcgcu</b>  | .....                  | 2   | 1   | smb   |    |        |
| .....  | <b>.....uuCguccaguguaccugcgcu</b>  | .....                  | 1   | 1   | smb   |    |        |
| .....  | <b>.....uuugCccaguguaccugcgcu</b>  | .....                  | 1   | 1   | smb   |    |        |
| .....  | <b>.....Cuuguccaguguaccugcgcu</b>  | .....                  | 1   | 1   | smb   |    |        |
| .....  | <b>.....uuuguccagugAaccugcgcu</b>  | .....                  | 2   | 1   | smb   |    |        |
| .....  | <b>.....uuuguccagugAaccugcgcu</b>  | .....                  | 1   | 1   | smb   |    |        |
| .....  | <b>.....uuuguccaguguaccugcgU</b>   | .....                  | 2   | 1   | smb   |    |        |
| .....  | <b>.....uuuguccaguguaccugcgcu</b>  | .....                  | 693 | 0   | smb   |    |        |
| .....  | <b>.....uuuguccaguguaccugcgCG</b>  | .....                  | 2   | 1   | smb   |    |        |
| .....  | <b>.....uuuguccaguguaUcugcgcu</b>  | .....                  | 1   | 1   | smb   |    |        |
| .....  | <b>.....uuuguccaguguaUugcgcu</b>   | .....                  | 1   | 1   | smb   |    |        |
| .....  | <b>.....uuuguccagugAaccugcgcu</b>  | .....                  | 1   | 1   | smb   |    |        |
| .....  | <b>.....uuuguccaUuguaccugcgcu</b>  | .....                  | 1   | 1   | smb   |    |        |

Star

Mature

auccagcgcagguaacacuggacaaacaauaucagaaagcagauuggggccaaucugcuuucgauauuguuuguccaguguaccugcgcuggaggggaggggcccguugc  
.....uuuguccaguguaccugcCcg..... 1 1 smb  
.....uuuguccaguguaccugcgcg..... 191 0 smb  
.....uuuguccaguguaccugcgcgU..... 18 1 smb  
.....uuuguccaguguaccugcgcgUa..... 1 1 smb

Provisional ID : 3820154\_60939\_1893288\_3690600+,...,3803400+\_15625  
 Score total : 433.2  
 Score for star read(s) : 3.9  
 Score for read counts : 424.8  
 Score for mfe : 3.5  
 Score for randfold : 1.6  
 Score for cons. seed : -0.6  
 Total read count : 845  
 Mature read count : 534  
 Loop read count : 0  
 Star read count : 311

5' A C U U A G A A C U C U C C U A C G A G G G C U U G G A G U U G U C C U U C C U U G A U  
 3' U C A A U C U U G A G A G G A U G C U C C C A A C C U C G A C A G C A C G A A C U A

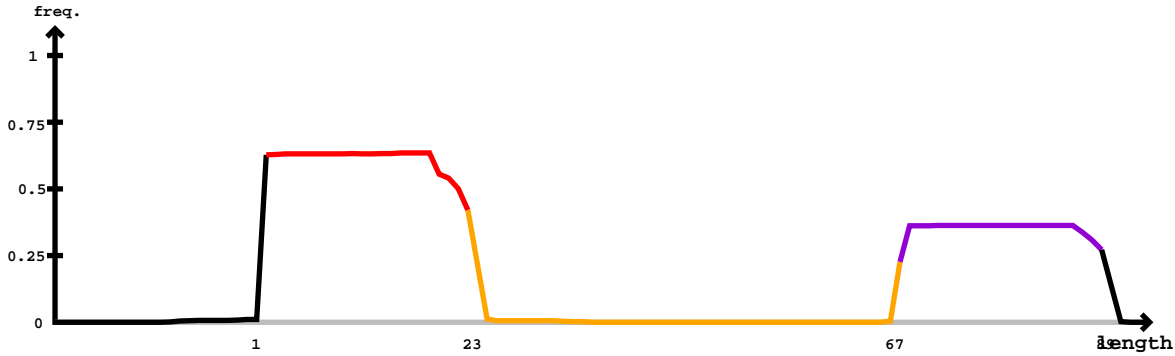

### Mature

### Star

| 5' - agccugacugaucuaggacg                                                                                                    | acuuagaaucuccuacgagggcuuggaguugucguccuugauaucaaggacgacagcuccaagcc | cucguaggagaguucuaagucgucca | -3'   | obs | mm | sample |
|------------------------------------------------------------------------------------------------------------------------------|-------------------------------------------------------------------|----------------------------|-------|-----|----|--------|
| agccugacugaucuaggacgacuuagaaucuccuacgagggcuuggaguugucguccuugauaucaaggacgacagcuccaagcc                                        |                                                                   |                            | exp   |     |    |        |
| .....((((((((((((((((((((((((((((((((((((((((((((((((((((((((((((.....)))))))))))))))))))))))))))))))))))))))))))))))))))))) |                                                                   |                            |       |     |    |        |
| ..... .aucauggacgacuuagaaucuccuacgaggg.                                                                                      |                                                                   |                            | reads | 1   | 0  | smb    |
| ..... .ucauggacgacuuagaauc.                                                                                                  |                                                                   |                            | 1     | 0   |    | smb    |
| ..... .ucauggacgacuuagaaucuccuacgagggc.                                                                                      |                                                                   |                            | 2     | 0   |    | smb    |
| ..... .cauggacgacuuagaaucuccuacgagggcu.                                                                                      |                                                                   |                            | 1     | 0   |    | smb    |
| ..... .auggacgacuuagaaucuccu.                                                                                                |                                                                   |                            | 1     | 0   |    | smb    |
| ..... .acgacuuagaaucuccuacgagggcu.                                                                                           |                                                                   |                            | 1     | 0   |    | smb    |
| ..... .cgacuuagaaucuccuacgagggcu.                                                                                            |                                                                   |                            | 2     | 1   |    | smb    |
| ..... .acuuagaaucuccuacg.                                                                                                    |                                                                   |                            | 66    | 0   |    | smb    |
| ..... .acuuagaaUucuccuacg.                                                                                                   |                                                                   |                            | 1     | 1   |    | smb    |
| ..... .acuuagaaucuccuacU.                                                                                                    |                                                                   |                            | 1     | 1   |    | smb    |
| ..... .acuuagaaucuccuacgU.                                                                                                   |                                                                   |                            | 2     | 1   |    | smb    |
| ..... .acuuagaaucuccuacga.                                                                                                   |                                                                   |                            | 10    | 0   |    | smb    |
| ..... .acuuagaaucuccuacgaU.                                                                                                  |                                                                   |                            | 1     | 1   |    | smb    |
| ..... .acuuagaaucuccuacgag.                                                                                                  |                                                                   |                            | 33    | 0   |    | smb    |
| ..... .acuuagaaucuccuacgagU.                                                                                                 |                                                                   |                            | 1     | 1   |    | smb    |
| ..... .acuuGgaucuccuacgagg.                                                                                                  |                                                                   |                            | 1     | 1   |    | smb    |
| ..... .acuuagaaucuccuacgagg.                                                                                                 |                                                                   |                            | 67    | 0   |    | smb    |
| ..... .acuuagaaUucuccuacgaggg.                                                                                               |                                                                   |                            | 1     | 1   |    | smb    |
| ..... .acuuagaaucuccuacgaggU.                                                                                                |                                                                   |                            | 2     | 1   |    | smb    |
| ..... .acuuagaaucuccuacgaggg.                                                                                                |                                                                   |                            | 333   | 0   |    | smb    |
| ..... .acuuagaaucuuUcuaacgaggg.                                                                                              |                                                                   |                            | 1     | 1   |    | smb    |
| ..... .acuuagaaucuccuacgagggU.                                                                                               |                                                                   |                            | 8     | 1   |    | smb    |
| ..... .acuuagaaucuccuacgagggA.                                                                                               |                                                                   |                            | 1     | 1   |    | smb    |
| ..... .cuuagaaucuccuacga.                                                                                                    |                                                                   |                            | 1     | 0   |    | smb    |
| ..... .uuagaaucuccuacgaggg.                                                                                                  |                                                                   |                            | 1     | 1   |    | smb    |
| ..... .uuagaaucuccuacgagggcu.                                                                                                |                                                                   |                            | 1     | 1   |    | smb    |
| ..... .ucuccuacgagggcuuggaguu.                                                                                               |                                                                   |                            | 1     | 0   |    | smb    |
| ..... .ccuacgagggcuuggaguu.                                                                                                  |                                                                   |                            | 1     | 0   |    | smb    |
| ..... .uacgagggcuuggaguu.                                                                                                    |                                                                   |                            | 1     | 0   |    | smb    |
| ..... .uacgagggcuuggaguu.                                                                                                    |                                                                   |                            | 1     | 0   |    | smb    |
| ..... .uacgagggcuuggaguu.                                                                                                    |                                                                   |                            | 1     | 0   |    | smb    |
| ..... .acgagggcuuAagaguu.                                                                                                    |                                                                   |                            | 1     | 1   |    | smb    |
| ..... .ccucguaggagaguucuaag.                                                                                                 |                                                                   |                            | 1     | 0   |    | smb    |
| ..... .ccucguaggagaguucuaaguc.                                                                                               |                                                                   |                            | 2     | 0   |    | smb    |



**Mature**

**Star**

|                                                                                                              |     |   |     |
|--------------------------------------------------------------------------------------------------------------|-----|---|-----|
| agccugacugaucauggacgacuuagaaucuccuacgagggcuuggaguugucguccuugauucaaggacgacagcuccaagccucguaggagaguucuaagcgucca |     |   |     |
| .....UcucguaggagaguucuaagcG...                                                                               | 1   | 1 | smb |
| .....cucguaggagaguucuaaU.....                                                                                | 2   | 1 | smb |
| .....cucguaggagaguucuaag.....                                                                                | 19  | 0 | smb |
| .....cucguaggagaguucuaagu.....                                                                               | 24  | 0 | smb |
| .....cucguaggagaguucuaaguc.....                                                                              | 29  | 0 | smb |
| .....cucguaggagaguucuaagcG.....                                                                              | 107 | 0 | smb |
| .....cucguaggagaguucuaagcU...                                                                                | 2   | 1 | smb |
| .....cucguaggagaguucuaagcgu...                                                                               | 7   | 0 | smb |
| .....ucguaggagaguucuaagu.....                                                                                | 1   | 0 | smb |
| .....ucguaggagaguucuaagcU...                                                                                 | 1   | 1 | smb |
| .....ucguaggagaguucuaagcG.....                                                                               | 5   | 0 | smb |
| .....ucguaggagaguucuaagcgu...                                                                                | 107 | 0 | smb |
| .....ucguaggagaguucuaagcG...                                                                                 | 1   | 1 | smb |
| .....ucguaggagaguucuaagcguU..                                                                                | 1   | 1 | smb |
| .....uaggagaguucuaagcGuc..                                                                                   | 1   | 0 | smb |





**Mature**

**Star**

cugcacaaaugccaaaccaaaccaucacuccacaagggauuuguauaacggagcgcgcgucguauacaaaaucccucggccuccguauacaaauccuuguggagugauuagu  
.....aacccuuuguggagugauuag. 4 0 smb  
.....aacccuuuguggagugauuag 2 0 smb
