# Supplementary material for: Integrating microRNA and mRNA expression profiling in Symbiodinium microadriaticum, a dinoflagellate symbiont of reef-building corals
Source: PubMed Central journal article supplement (PMC3853145; doi:10.1186/1471-2164-14-704), 2013-10-12

## RNase III 1

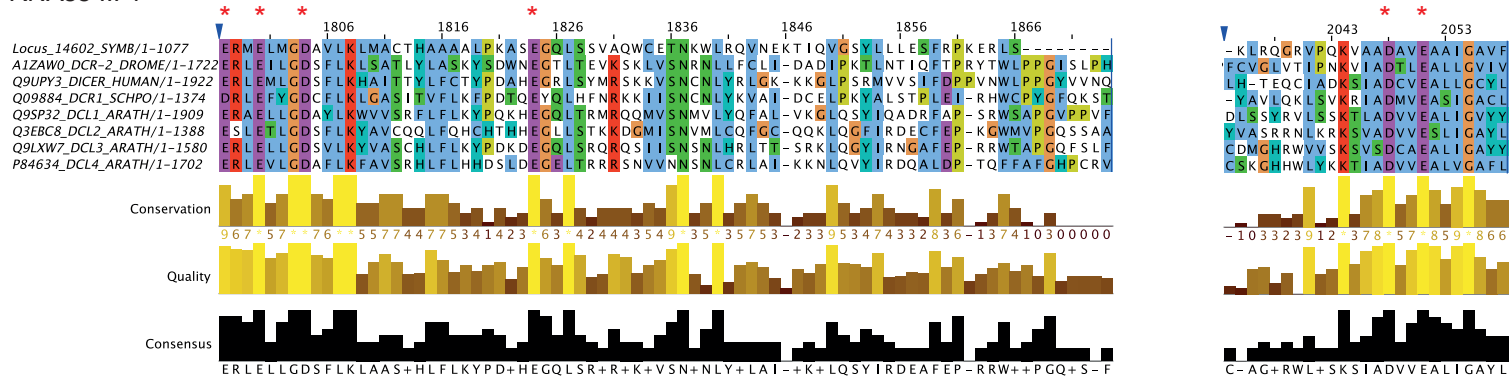

## RNase III 2

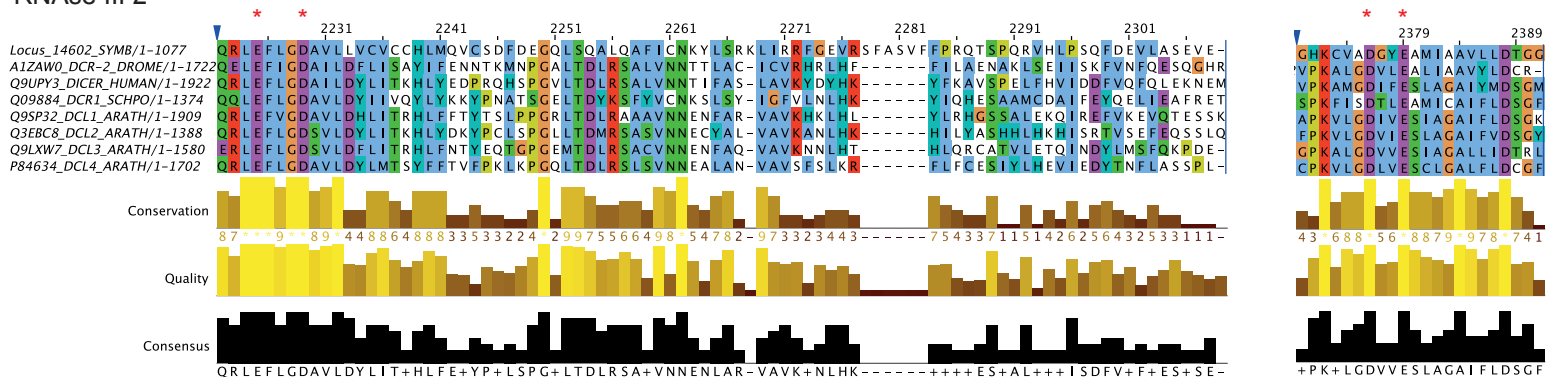

Supplement: 1471-2164-14-704-S8.pdf [file 1471-2164-14-704-S8.pdf]
