# Supplementary material for: Integrating microRNA and mRNA expression profiling in Symbiodinium microadriaticum, a dinoflagellate symbiont of reef-building corals
Source: PubMed Central journal article supplement (PMC3853145; doi:10.1186/1471-2164-14-704), 2013-10-12

## PAZ

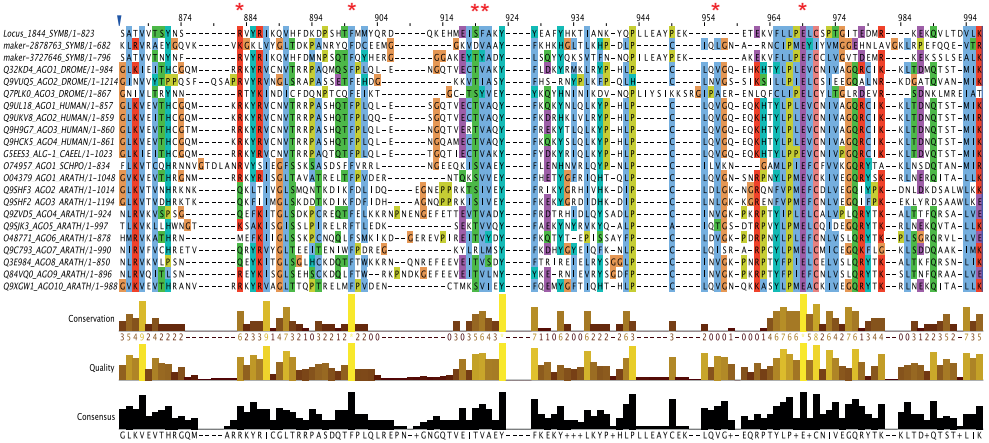

## PIWI

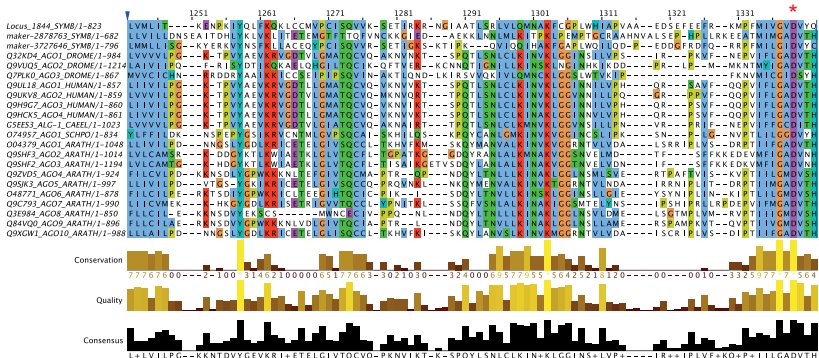

## PIWI

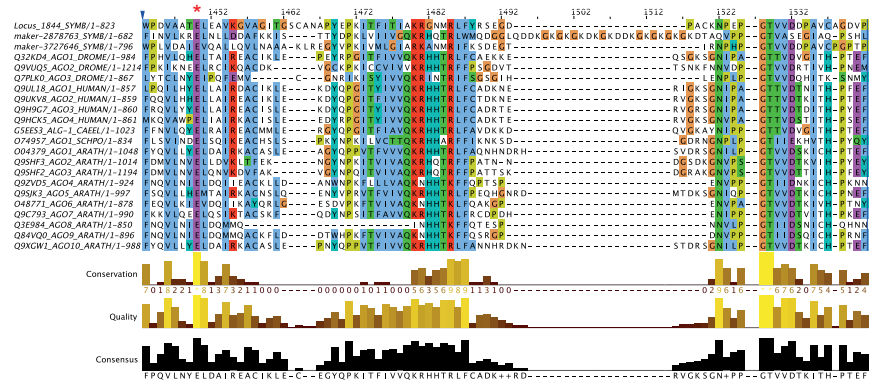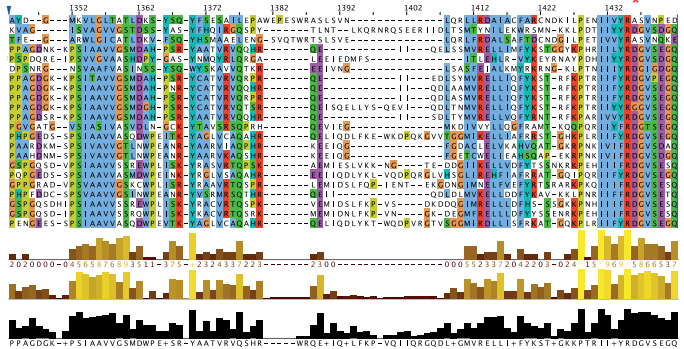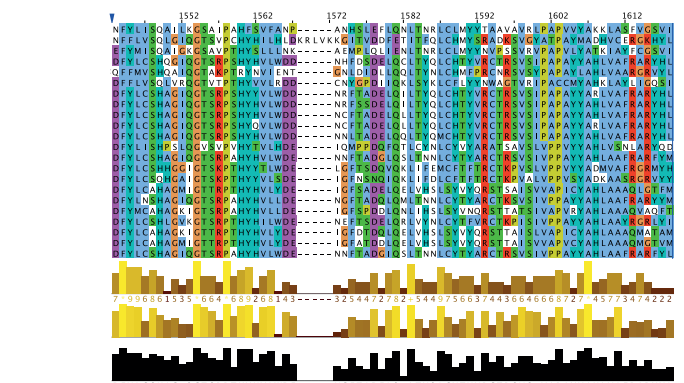

Supplement: 1471-2164-14-704-S9.pdf [file 1471-2164-14-704-S9.pdf]
